# Supplementary material
Source: ML conference proceedings conference paper supplement (https://openreview.net/forum?id=Ya8WzNF8oQ)
Supplement: supplementary_material [file attachment]

## Supplementary Material

462

463 Subsequently, we provide a complete collection of proofs for the stated results in the main body. We  
464 restate these results to enhance readability and ensure a clear understanding of the proof details.

### 465 A Proofs of Section 2

466 **Lemma 2.1** (Performance difference lemma). *For any  $h \in \mathcal{H}$  and for any pair of policies  $\pi$  and  $\pi'$*   
467 *the following holds true for every  $s \in \mathcal{S}_h$ :*

$$V_h^\pi(s) - V_h^{\pi'}(s) = \sum_{k=h}^{H-1} \mathbb{E}_{S_h=s}^{\pi^{(h)}} \left[ A_k^{\pi'}(S_k, A_k) \right].$$

*Proof.*

$$\begin{aligned} V_h^\pi(s) - V_h^{\pi'}(s) &= \mathbb{E}_{S_h=s}^{\pi^{(h)}} \left[ \sum_{k=h}^{H-1} r(S_k, A_k) \right] - V_h^{\pi'}(s) \\ &= \mathbb{E}_{S_h=s}^{\pi^{(h)}} \left[ \sum_{k=h}^{H-1} r(S_k, A_k) + \sum_{k=h}^{H-1} V_k^{\pi'}(S_k) - \sum_{k=h}^{H-1} V_k^{\pi'}(S_k) \right] - V_h^{\pi'}(s) \\ &= \mathbb{E}_{S_h=s}^{\pi^{(h)}} \left[ \sum_{k=h}^{H-1} r(S_k, A_k) + \sum_{k=h+1}^{H-1} V_k^{\pi'}(S_k) - \sum_{k=h}^{H-1} V_k^{\pi'}(S_k) \right] \\ &= \mathbb{E}_{S_h=s}^{\pi^{(h)}} \left[ \sum_{k=h}^{H-1} r(S_k, A_k) + \sum_{k=h}^{H-2} V_{k+1}^{\pi'}(S_{k+1}) - \sum_{k=h}^{H-1} V_k^{\pi'}(S_k) \right] \\ &= \mathbb{E}_{S_h=s}^{\pi^{(h)}} \left[ \sum_{k=h}^{H-1} (r(S_k, A_k) + V_{k+1}^{\pi'}(S_{k+1}) - V_k^{\pi'}(S_k)) \right] \\ &= \mathbb{E}_{S_h=s}^{\pi^{(h)}} \left[ \sum_{k=h}^{H-1} A_k^{\pi'}(S_k, A_k) \right] \\ &= \sum_{k=h}^{H-1} \mathbb{E}_{S_h=s}^{\pi^{(h)}} \left[ A_k^{\pi'}(S_k, A_k) \right], \end{aligned}$$

468 where we have used that  $r(S_k, A_k) + V_{k+1}^{\pi'}(S_{k+1}) = Q_k^{\pi'}(S_k, A_k)$ . In the fifth equation we used the  
469 notation  $V_H \equiv 0$  and note that  $Q_{H-1} \equiv r$  independent of any policy.  $\square$

470 Unless explicitly specified, all differentiations are performed with respect to the variable  $\theta$ .

471 **Theorem 2.2.** *For a fixed policy  $\tilde{\pi}$  and  $h \in \mathcal{H}$  the gradient of  $J_{h,s}(\theta)$  defined in (6) is given by*

$$\nabla J_{h,s}(\theta) = \mathbb{E}_{S_h=s, A_h \sim \pi^\theta(\cdot|s)} [\nabla \log(\pi^\theta(A_h|S_h)) Q_h^{\tilde{\pi}}(S_h, A_h)].$$

472 *Proof.* The probability of a trajectory  $w = (s_h, a_h, \dots, s_{H-1}, a_{H-1})$  under the policy  
473  $(\pi^\theta, \tilde{\pi}_{(h+1)}) = (\pi^\theta, \tilde{\pi}_{h+1}, \dots, \tilde{\pi}_{H-1})$  and initial state distribution  $\delta_s$  is given by

$$\mathbb{P}_s^{(\pi^\theta, \tilde{\pi}_{(h+1)})}(w) = \delta_s(s_h) \pi^\theta(a_h|s_h) \prod_{k=h+1}^{H-1} p(s_k|s_{k-1}, a_{k-1}) \tilde{\pi}_k(a_k|s_k).$$

474 Then,

$$\begin{aligned} \nabla \log(\mathbb{P}_s^{(\pi^\theta, \tilde{\pi}_{(h+1)})}(w)) &= \nabla \left( \log(\delta_s(s_h)) + \log(\pi^\theta(a_h|s_h)) \right. \\ &\quad \left. + \sum_{k=h+1}^{H-1} \log(p(s_k|s_{k-1}, a_{k-1}) + \log(\tilde{\pi}_k(a_k|s_k))) \right) \\ &= \nabla \log(\pi^\theta(a_h|s_h)), \end{aligned}$$

475 which is known as the log-trick. Let  $\mathcal{W}$  be the set of all trajectories from  $h$  to  $H - 1$ . Note that  $\mathcal{W}$  is  
 476 finite due to the assumption that state and action space is finite. Then for  $s \in \mathcal{S}_h$

$$\begin{aligned}
 \nabla J_{h,s}(\theta) &= \nabla \sum_{w \in \mathcal{W}} \mathbb{P}_s^{(\pi^\theta, \tilde{\pi}^{(h+1)})}(w) \sum_{k=h}^{H-1} r(s_k, a_k) \\
 &= \sum_{w \in \mathcal{W}} \mathbb{P}_s^{(\pi^\theta, \tilde{\pi}^{(h+1)})}(w) \nabla \log(\mathbb{P}_s^{(\pi^\theta, \tilde{\pi}^{(h+1)})}) \sum_{k=h}^{H-1} r(s_k, a_k) \\
 &= \sum_{w \in \mathcal{W}} \mathbb{P}_s^{(\pi^\theta, \tilde{\pi}^{(h+1)})}(w) \nabla \log(\pi^\theta(a_h | s_h)) \sum_{k=h}^{H-1} r(s_k, a_k) \\
 &= \mathbb{E}_{\mathcal{S}_h=s}^{(\pi^\theta, \tilde{\pi}^{(h+1)})} \left[ \nabla \log(\pi^\theta(A_h | S_h)) \sum_{k=h}^{H-1} r(S_k, A_k) \right] \\
 &= \mathbb{E}_{\mathcal{S}_h=s}^{(\pi^\theta, \tilde{\pi}^{(h+1)})} \left[ \nabla \log(\pi^\theta(A_h | S_h)) \mathbb{E}_{\mathcal{S}_h}^{\tilde{\pi}} \left[ \sum_{k=h}^{H-1} r(S_k, A_k) | S_h, A_h \right] \right] \\
 &= \mathbb{E}_{\mathcal{S}_h=s, A_h \sim \pi^\theta(\cdot | s)} \left[ \nabla \log(\pi^\theta(A_h | S_h)) Q_h^{\tilde{\pi}}(S_h, A_h) \right].
 \end{aligned}$$

477

□

478 **Corollary 2.3.** For any  $h \in \mathcal{H}$  and two policies  $\pi$  and  $\pi'$ : If  $\pi_{(h+1)} = \pi'_{(h+1)}$ , it holds that

$$V_h^\pi(s) - V_h^{\pi'}(s) = \mathbb{E}_{\mathcal{S}_h=s}^{\pi^{(h)}} \left[ A_h^{\pi'}(S_h, A_h) \right].$$

479 *Proof.* Let  $k > h$ , then

$$\begin{aligned}
 &\mathbb{E}_{\mathcal{S}_h=s}^{\pi^{(h)}} \left[ A_k^{\pi'}(S_k, A_k) \right] \\
 &= \sum_{a \in \mathcal{A}} \pi_h(a | s) \sum_{s \in \mathcal{S}} p(s | s, a) \mathbb{E}_{\mathcal{S}_{h+1}=s}^{\pi^{(h+1)}} \left[ Q_k^{\pi'}(S_k, A_k) - V_k^{\pi'}(S_k) \right] \\
 &= \sum_{a \in \mathcal{A}} \pi_h(a | s) \sum_{s \in \mathcal{S}} p(s | s, a) \mathbb{E}_{\mathcal{S}_{h+1}=s}^{\pi^{(h+1)}} \left[ Q_k^{\pi'}(S_k, A_k) - V_k^{\pi'}(S_k) \right] \\
 &= \sum_{a \in \mathcal{A}} \pi_h(a | s) \sum_{s \in \mathcal{S}} p(s | s, a) \left( \mathbb{E}_{\mathcal{S}_{h+1}=s}^{\pi^{(h+1)}} \left[ \mathbb{E}_{\mathcal{S}_k}^{\pi'} \left[ Q_k^{\pi'}(S_k, A_k) \right] \right] - \mathbb{E}_{\mathcal{S}_{h+1}=s}^{\pi^{(h+1)}} \left[ V_k^{\pi'}(S_k) \right] \right) \\
 &= \sum_{a \in \mathcal{A}} \pi_h(a | s) \sum_{s \in \mathcal{S}} p(s | s, a) \left( \mathbb{E}_{\mathcal{S}_{h+1}=s}^{\pi^{(h+1)}} \left[ V_k^{\pi'}(S_k) \right] - \mathbb{E}_{\mathcal{S}_{h+1}=s}^{\pi^{(h+1)}} \left[ V_k^{\pi'}(S_k) \right] \right) \\
 &= 0.
 \end{aligned}$$

480 The claim follows with Lemma 2.1.

□

## 481 B Proofs of Section 3

### 482 B.1 Proofs of Section 3.1

483 First, we compute the derivative of the softmax policy for every  $s \in \mathcal{S}_h$  and  $a \in \mathcal{A}_s$ ,

$$\pi^\theta(a | s) = \frac{e^{\theta(s,a)}}{\sum_{a' \in \mathcal{A}} e^{\theta(s,a')}},$$

484 with parameter  $\theta \in \mathbb{R}^{d_h}$ :

$$\frac{\partial \log(\pi^\theta(a | s))}{\partial \theta(a', s')} = \mathbf{1}_{\{s=s'\}} (\mathbf{1}_{\{a=a'\}} - \pi^\theta(a' | s')).$$

485 Hence,

$$\nabla \log(\pi^\theta(a | s)) = \left( \mathbf{1}_{\{s=s'\}} (\mathbf{1}_{\{a=a'\}} - \pi^\theta(a' | s')) \right)_{s' \in \mathcal{S}_h, a' \in \mathcal{A}_{s'}} \in \mathbb{R}^{d_h}.$$

486 **Lemma 3.2.** Let  $h \in \mathcal{H}$ , then the partial derivatives of  $J_h$  with respect to  $\theta$  take the following form

$$\frac{\partial J_h(\theta)}{\partial \theta(s, a)} = \mu(s) \pi^\theta(a|s) A_h^{(\pi^\theta, \tilde{\pi}^{(h+1)})}(s, a).$$

487 *Proof.* By the policy gradient Theorem 2.2,

$$\begin{aligned} \nabla J_h(\theta) &= \nabla \mathbb{E}_{s \sim \mu} [J_{h,s}(\theta)] \\ &= \sum_{s \in \mathcal{S}} \mu(s) \nabla J_{h,s}(\theta) \\ &= \sum_{s \in \mathcal{S}} \mu(s) \mathbb{E}_{S_h=s, A_h \sim \pi^\theta(\cdot|s)} [\nabla \log(\pi^\theta(A_h|S_h)) Q_h^{\tilde{\pi}}(S_h, A_h)]. \end{aligned}$$

488 Next we plug in the derivative of the softmax parametrization and obtain

$$\begin{aligned} &\nabla J_h(\theta) \\ &= \sum_{s \in \mathcal{S}} \mu(s) \mathbb{E}_{S_h=s, A_h \sim \pi^\theta(\cdot|s)} \left[ \left( \mathbf{1}_{\{S_h=s'\}} (\mathbf{1}_{\{A_h=a'\}} - \pi^\theta(a'|s')) \right)_{s' \in \mathcal{S}_h, a' \in \mathcal{A}_{s'}} Q_h^{\tilde{\pi}}(S_h, A_h) \right] \\ &= \left( \sum_{s \in \mathcal{S}} \mu(s) \sum_{a \in \mathcal{A}_s} \pi^\theta(a|s) \mathbf{1}_{\{s=s'\}} (\mathbf{1}_{\{a=a'\}} - \pi^\theta(a'|s')) Q_h^{\tilde{\pi}}(s, a) \right)_{s' \in \mathcal{S}_h, a' \in \mathcal{A}_{s'}} \\ &= \left( \mu(s') \pi^\theta(a'|s') Q_h^{\tilde{\pi}}(s', a') - \mu(s') \pi^\theta(a'|s') \sum_{a \in \mathcal{A}_s} \pi^\theta(a|s') Q_h^{\tilde{\pi}}(s', a) \right)_{s' \in \mathcal{S}_h, a' \in \mathcal{A}_{s'}} \\ &= \left( \mu(s') \pi^\theta(a'|s') (Q_h^{\tilde{\pi}}(s', a') - V_h^{(\pi^\theta, \tilde{\pi}^{(h+1)})}(s')) \right)_{s' \in \mathcal{S}_h, a' \in \mathcal{A}_{s'}} \\ &= \left( \mu(s') \pi^\theta(a'|s') A_h^{(\pi^\theta, \tilde{\pi}^{(h+1)})}(s', a') \right)_{s' \in \mathcal{S}_h, a' \in \mathcal{A}_{s'}}, \end{aligned}$$

489 where we used that  $\sum_{a \in \mathcal{A}_s} \pi^\theta(a|s') Q_h^{\tilde{\pi}}(s', a) = J_{h,s'}(\theta) = V_h^{(\pi^\theta, \tilde{\pi}^{(h+1)})}(s')$ .  $\square$

490 **Proposition 3.3.** Let  $h \in \mathcal{H}$  and consider the objective function  $J_h(\theta)$ . If there exists  $G, M > 0$   
491 such that

$$\|\nabla \log \pi^\theta(a|s)\|_2 \leq G \quad \text{and} \quad \|\nabla^2 \log \pi^\theta(a|s)\|_2 \leq M,$$

492 for all  $s \in \mathcal{S}_h$ ,  $a \in \mathcal{A}_s$ , then for any initial state distribution  $\mu_h$  of  $S_h$  the function  $J_h(\theta)$  is  $\beta_h$ -smooth  
493 in  $\theta$  with  $\beta_h = (H-h)R^*(G^2 + M)$ .

494 *Proof.* Define  $\mathcal{W}$  as the set of all possible trajectories from  $h$  to  $H$  and consider  $\hat{\pi}^\theta := (\pi^\theta, \tilde{\pi}^{(h+1)})$   
495 as in the proof of Theorem 2.2. Fix any initial state distribution  $\mu_h$  on  $\mathcal{S}_h$ , then the probability of  $w$  is

$$p_{\mu_h}(w|\hat{\pi}^\theta) = \mu_h(s_h) \pi^\theta(a_h|s_h) \prod_{k=h+1}^{H-1} p(s_k|s_{k-1}, a_{k-1}) \tilde{\pi}(a_k|s_k).$$

496 It holds that

$$\nabla^2 J_h(\theta) = \sum_{w \in \mathcal{W}} \nabla^2 p_{\mu_h}(w|\hat{\pi}^\theta) \underbrace{\sum_{k=h}^{H-1} r(s_k, a_k)}_{:=r(w)}. \quad (12)$$

497 Now,

$$\begin{aligned} \nabla^2 \log(p_{\mu_h}(w|\hat{\pi}^\theta)) &= \nabla \left( p_{\mu_h}(w|\hat{\pi}^\theta)^{-1} \nabla p_{\mu_h}(w|\hat{\pi}^\theta) \right) \\ &= p_{\mu_h}(w|\hat{\pi}^\theta)^{-1} \nabla^2 p_{\mu_h}(w|\hat{\pi}^\theta) \\ &\quad - p_{\mu_h}(w|\hat{\pi}^\theta)^{-2} \nabla p_{\mu_h}(w|\hat{\pi}^\theta) \nabla p_{\mu_h}(w|\hat{\pi}^\theta)^T, \end{aligned}$$

498 rearranging leads to

$$\nabla^2 p_{\mu_h}(w|\hat{\pi}^\theta) = p_{\mu_h}(w|\hat{\pi}^\theta) \left( \nabla^2 \log(p_{\mu_h}(w|\hat{\pi}^\theta)) + p_{\mu_h}(w|\hat{\pi}^\theta)^{-2} \nabla p_{\mu_h}(w|\hat{\pi}^\theta) \nabla p_{\mu_h}(w|\hat{\pi}^\theta)^T \right) \quad (13)$$

$$= p_{\mu_h}(w|\hat{\pi}^\theta) \left( \nabla^2 \log(p_{\mu_h}(w|\hat{\pi}^\theta)) + \nabla \log(p_{\mu_h}(w|\hat{\pi}^\theta)) \nabla \log(J_h(\theta))^T \right). \quad (14)$$

499 Substitute (14) into (12):

$$\begin{aligned} & \nabla^2 J_h(\theta) \\ &= \sum_{w \in \mathcal{W}} p_{\mu_h}(w|\hat{\pi}^\theta) \left( \nabla^2 \log(p_{\mu_h}(w|\hat{\pi}^\theta)) + \nabla \log(p_{\mu_h}(w|\hat{\pi}^\theta)) \nabla \log(p_{\mu_h}(w|\hat{\pi}^\theta))^T \right) r(w). \end{aligned}$$

500 Using the log-trick similar to Theorem 2.2 yields

$$\nabla \log(p_{\mu_h}(w|\hat{\pi}^\theta)) = \nabla \log(\pi^\theta(a_h|s_h))$$

501 and

$$\nabla^2 \log(p_{\mu_h}(w|\hat{\pi}^\theta)) = \nabla^2 \log(\pi^\theta(a_h|s_h)).$$

502 Together with the assumption we made on the derivative and hessian of the log parametrized policy  
503 we obtain

$$\begin{aligned} & \|\nabla^2 J_h(\theta)\|_2 \\ &= \left\| \sum_{w \in \mathcal{W}} p_{\mu_h}(w|\hat{\pi}^\theta) \left( \nabla^2 \log(p_{\mu_h}(w|\hat{\pi}^\theta)) + \nabla \log(p_{\mu_h}(w|\hat{\pi}^\theta)) \nabla \log(p_{\mu_h}(w|\hat{\pi}^\theta))^T \right) r(w) \right\|_2 \\ &\leq \sum_{w \in \mathcal{W}} p_{\mu_h}(w|\hat{\pi}^\theta) r(w) \left( \|\nabla^2 \log(\pi^\theta(a_h|s_h))\|_2 + \|\nabla \log(\pi^\theta(a_h|s_h))\|_2^2 \right) \\ &\leq \max_{w \in \mathcal{W}} r(w) (M + G^2) \\ &\leq (H - h) R^* (M + G^2), \end{aligned}$$

504 which completes the proof. Recall that  $R^*$  is the maximal reward.  $\square$

505 **Lemma 3.4.** *Let  $h \in \mathcal{H}$ , then the  $h$ -state value function under softmax parametrization,  $\theta \mapsto J_h(\theta)$ ,  
506 is  $\beta_h$ -smooth with  $\beta_h = 2(H - h)R^*|\mathcal{A}|$ .*

507 *Proof.* We use Proposition 3.3 for the softmax parametrization and see that

$$\|\nabla \log(\pi^\theta(a|s))\|_2 = \sqrt{\sum_{a' \in \mathcal{A}} (\mathbf{1}_{\{a'=a\}} - \pi^\theta(a'|s))^2} \leq \sqrt{|\mathcal{A}_s|} \leq \sqrt{|\mathcal{A}|}$$

508 and (Frobenius norm)

$$\begin{aligned} \|\nabla^2 \log(\pi^\theta(a|s))\|_2 &= \sqrt{\sum_{a^* \in \mathcal{A}_s} \sum_{a' \in \mathcal{A}_s} (\mathbf{1}_{\{a^*=a'\}} \pi^\theta(a'|s) - \pi^\theta(a^*|s) \pi^\theta(a'|s))^2} \\ &\leq \sqrt{|\mathcal{A}_s| |\mathcal{A}_s|} \\ &\leq |\mathcal{A}|. \end{aligned}$$

509 Using Proposition 3.3 with  $G = \sqrt{|\mathcal{A}|}$  and  $M = |\mathcal{A}|$  yields the claim.  $\square$

510 **Theorem 3.5.** *Let  $h \in \mathcal{H}$  and consider the gradient ascent updates*

$$\theta_{n+1} = \theta_n + \eta_h \nabla J_h(\theta_n) \quad (7)$$

511 *for arbitrary  $\theta_0 \in \mathbb{R}^{d_h}$ . We assume that  $\mu_h(s) > 0$  for all  $s \in \mathcal{S}_h$  and  $0 < \eta_h \leq \frac{1}{\beta_h}$ . Then, for all  
512  $s \in \mathcal{S}_h$ ,  $J_{h,s}(\theta_n)$  converges to  $J_{h,s}^*$  for  $n \rightarrow \infty$ , where  $J_{h,s}^* = \sup_\theta J_{h,s}(\theta) < \infty$ .*

513 The idea of the proof follows the line of arguments in Agarwal et al. (2021) for the asymptotic  
 514 convergence of softmax policy gradient in the discounted stationary MDP setting. Thus, we first have  
 515 to show a row of lemmata, compare to Lemma 41 to 51 in Agarwal et al. (2021).

516 **Lemma B.1** (Monotonicity). *If the learning rate satisfies  $0 < \eta_h \leq \frac{1}{\beta_h} = \frac{1}{2(H-h)R^*|A|}$  then  
 517  $J_{h,s}(\theta_{n+1}) \geq J_{h,s}(\theta_n)$  for any  $s \in \mathcal{S}_h$ . Furthermore, for all  $s \in \mathcal{S}_h$  there exists a limit  $J_{h,s}^\infty$  such  
 518 that*

$$\lim_{n \rightarrow \infty} J_{h,s}(\theta_n) = J_{h,s}^\infty < \infty.$$

519 *Proof.* By (Beck, 2017, Theorem 10.4) we have for any  $\beta$ -smooth function  $f : \mathbb{R}^d \rightarrow \mathbb{R}$ , that  
 520  $(f(x^k))_{k \geq 0}$  is non-increasing sequence, when  $x^{k+1} = x^k - \eta \nabla f(x^k)$  with  $\eta \leq \frac{1}{\beta}$ .

521 First note that  $-J_{h,s}$  is also  $\beta_h$ -smooth. Then we have

$$\nabla J_h(\theta) = \nabla \left( \sum_{s \in \mathcal{S}_h} \mu_h(s) J_{h,s}(\theta) \right) = \sum_{s \in \mathcal{S}_h} \mu_h(s) \nabla J_{h,s}(\theta),$$

522 and  $\frac{\partial J_{h,s}(\theta)}{\partial \theta(s',a)} = 0$  whenever  $s' \neq s$ . Denote by  $\theta(s) = \theta(s, \cdot) \in \mathbb{R}^{|\mathcal{A}_s|}$ , then

$$\theta(s)_{n+1} = \theta_n(s) + \eta_h \mu_h(s) \nabla J_{h,s}(\theta).$$

523 With the assumption  $0 < \mu_h(s) \leq 1$  for all  $s \in \mathcal{S}_h$  the first claim follows by (Beck, 2017, Theorem  
 524 10.4).

525 As  $J_{h,s}(\theta_n) \leq (H-h)R^*$  is bounded for all  $n \in \mathbb{N}$  the second claim follows directly from  
 526 monotonicity.  $\square$

527 To save notation we fix an  $h \in \mathcal{H}$ . All results hold true for an arbitrary epoch. We introduce the  
 528 following definitions without a subscript  $h$ :

$$\Delta = \min_{\{s,a | A_h^\infty(s,a) \neq 0\}} |A_h^\infty(s,a)|$$

529 where  $A_h^\infty(s,a) = Q_h^{\tilde{\pi}}(s,a) - J_{h,s}^\infty$ . Recall that  $\tilde{\pi}$  is the fixed policy which we use for  $h+1, \dots, H-1$ .

530 For the rest of this section, we write  $Q_h$  instead of  $Q_h^{\tilde{\pi}}$ . Further we denote by  $A_h^{\theta_n}(s,a) :=$   
 531  $Q_h(s,a) - J_{h,s}(\theta_n)$ , the advantage function with respect to parameter  $\theta_n$ .

532 We define the sets

$$\begin{aligned} I_0^s &= \{a \in \mathcal{A}_s \mid Q_h(s,a) = J_{h,s}^\infty\}, \\ I_+^s &= \{a \in \mathcal{A}_s \mid Q_h(s,a) > J_{h,s}^\infty\}, \\ I_-^s &= \{a \in \mathcal{A}_s \mid Q_h(s,a) < J_{h,s}^\infty\}. \end{aligned}$$

533 Note that we observe a fundamental difference to the proof of Agarwal et al. (2021) in the infinite  
 534 time setting. We do not need a limit of the state-action value function  $Q_h^\infty$ , because  $Q_h$  is independent  
 535 of  $\theta$  and only depends on  $\tilde{\pi}$ . We aim to prove that  $I_+^s$  is an empty set, then  $J_{h,s}^\infty = J_{h,a}^*$ .

536 **Lemma B.2.** *There exists a time  $N_1 > 0$  such that for all  $n > N_1$ , and  $s \in \mathcal{S}_h$ , we have*

$$A_h^{\theta_n}(s,a) < -\frac{\Delta}{4} \text{ for } a \in I_-^s; \quad A_h^{\theta_n}(s,a) > \frac{\Delta}{4} \text{ for } a \in I_+^s.$$

537 *Proof.* Fix  $s \in \mathcal{S}_h$  arbitrarily. As  $J_{h,s}(\theta_n) \rightarrow J_{h,s}^\infty$  for  $n \rightarrow \infty$  and  $\mathcal{S}_h$  is finite, we have that there  
 538 exists  $N_1 > 0$  such that for all  $n > N_1$  and  $s \in \mathcal{S}_h$ ,

$$J_{h,s}(\theta_n) > J_{h,s}^\infty - \frac{\Delta}{4}.$$

539 It follows for all  $n > N_1$ ,  $s \in \mathcal{S}_h$  and  $a \in I_-^s$  by the definition of  $\Delta$ :

$$A_h^{\theta_n}(s,a) = Q_h(s,a) - J_{h,s}(\theta_n) \leq Q_h(s,a) - J_{h,s}^\infty + \frac{\Delta}{4} \leq -\Delta + \frac{\Delta}{4} < -\frac{\Delta}{4}.$$

540 Similarly, for all  $n > N_1$ ,  $s \in \mathcal{S}_h$  and  $a \in I_+^s$  we obtain from monotonicity and the definition of  $\Delta$ ,

$$A_h^{\theta_n}(s,a) = Q_h(s,a) - J_{h,s}(\theta_n) \geq Q_h(s,a) - J_{h,s}^\infty \geq \Delta > \frac{\Delta}{4}.$$

541  $\square$

542 **Lemma B.3.** *It holds that  $\frac{\partial J_h(\theta_n)}{\partial \theta_n(s,a)} \rightarrow 0$  as  $n \rightarrow \infty$  for all  $s \in \mathcal{S}_h$ ,  $a \in \mathcal{A}_s$ . This implies that for*  
 543  *$a \in I_+^s \cup I_-^s$ ,  $\pi^{\theta_n}(a|s) \rightarrow 0$  and that  $\sum_{a \in I_0^s} \pi^{\theta_n}(a|s) \rightarrow 1$  for  $n \rightarrow \infty$ .*

544 *Proof.* From (Beck, 2017, Theorem 10.15) we deduce for any  $\beta$ -smooth function  $f : \mathbb{R}^d \rightarrow \mathbb{R}$ ,  
 545 that  $\|\nabla f(x^k)\| \rightarrow 0$  for  $k \rightarrow \infty$ , if  $x^{k+1} = x^k - \frac{1}{\beta} \nabla f(x^k)$ . By Lemma 3.4  $J_h(\cdot)$  is  $\beta_h$ -smooth.  
 546 It follows by our choice of  $\eta_h < \frac{1}{\beta_h}$  that  $\frac{\partial J_h(\theta_n)}{\partial \theta_n(s,a)} \rightarrow 0$  as  $n \rightarrow \infty$  for all  $s \in \mathcal{S}_h$ ,  $a \in \mathcal{A}_s$ . Now  
 547 remember from Lemma 3.2

$$\frac{\partial J_h(\theta_n)}{\partial \theta_n(s,a)} = \mu_h(s) \pi^{\theta_n}(a|s) A_h^{\theta_n}(s,a),$$

548 and by Lemma B.2  $|A_h^{\theta_n}(s,a)| > \frac{\Delta}{4}$  for all  $n > N_1$  and  $a \in I_+^s \cup I_-^s$ . As  $\mu_h(s) > 0$  by assumption  
 549 it follows that  $\pi^{\theta_n}(a|s) \rightarrow 0$  for  $n \rightarrow \infty$  for all  $a \in I_+^s \cup I_-^s$  from  $\frac{\partial J_h(\theta_n)}{\partial \theta_n(s,a)} \rightarrow 0$  as  $n \rightarrow \infty$ .  
 550 The last claim,  $\sum_{a \in I_0^s} \pi^{\theta_n}(a|s) \rightarrow 1$  for  $n \rightarrow \infty$ , follows immediately from  $\sum_{a \in \mathcal{A}_s} \pi^{\theta_n}(a|s) = 1$   
 551 by:

$$\begin{aligned} \lim_{n \rightarrow \infty} \sum_{a \in I_0^s} \pi^{\theta_n}(a|s) &= \lim_{n \rightarrow \infty} \left( \sum_{a \in \mathcal{A}_s} \pi^{\theta_n}(a|s) - \sum_{a \in I_+^s \cup I_-^s} \pi^{\theta_n}(a|s) \right) \\ &= 1 - \sum_{a \in I_+^s \cup I_-^s} \lim_{n \rightarrow \infty} \pi^{\theta_n}(a|s) \\ &= 1. \end{aligned}$$

552 □

553 **Lemma B.4.** *For  $a \in I_+^s$ , the sequence  $(\theta_n(s,a))_{n \geq 0}$  is strictly increasing for  $n > N_1$  and for*  
 554  *$a \in I_-^s$ , the sequence  $(\theta_n(s,a))_{n \geq 0}$  is strictly decreasing for  $n > N_1$ .*

555 *Proof.* With Lemma B.2 we know that for  $n > N_1$

$$A_h^{\theta_n}(s,a) > 0 \text{ for } a \in I_+^s; \quad A_h^{\theta_n}(s,a) < 0 \text{ for } a \in I_-^s,$$

556 and by Lemma 3.2

$$\frac{\partial J_h(\theta_n)}{\partial \theta_n(s,a)} = \mu_h(s) \pi^{\theta_n}(a|s) A_h^{\theta_n}(s,a).$$

557 As  $\mu_h(s) > 0$  and  $\pi^{\theta_n}(a|s) > 0$  by the definition of softmax parametrization, we have for all  $n > N_1$

$$\frac{\partial J_h(\theta_n)}{\partial \theta_n(s,a)} > 0 \text{ for } a \in I_+^s; \quad \frac{\partial J_h(\theta_n)}{\partial \theta_n(s,a)} < 0 \text{ for } a \in I_-^s.$$

558 This implies for  $a \in I_+^s$ ,

$$\theta_{n+1}(s,a) - \theta_n(s,a) = \eta_h \frac{\partial J_h(\theta_n)}{\partial \theta_n(s,a)} > 0,$$

559 i.e.  $(\theta_n(s,a))_{n \geq 0}$  is strictly increasing for  $n > N_1$  and similar for  $a \in I_-^s$ ,

$$\theta_{n+1}(s,a) - \theta_n(s,a) = \eta_h \frac{\partial J_h(\theta_n)}{\partial \theta_n(s,a)} < 0,$$

560 i.e.  $(\theta_n(s,a))_{n \geq 0}$  is strictly decreasing for  $n > N_1$ . □

561 **Lemma B.5.** *For all  $s \in \mathcal{S}_h$  where  $I_+^s \neq \emptyset$ , we have that*

$$\max_{a \in I_0^s} \theta_n(s,a) \rightarrow \infty \quad \text{and} \quad \min_{a \in \mathcal{A}_s} \theta_n(s,a) \rightarrow -\infty \quad \text{for } n \rightarrow \infty.$$

562 *Proof.* By assumption  $I_+^s \neq \emptyset$  there exists an  $a_+ \in I_+^s$  and by Lemma B.3 we have  $\pi^{\theta_n}(a_+|s) \rightarrow 0$ ,  
 563 as  $n \rightarrow \infty$ . Hence, by softmax parametrization this is equivalent to

$$\frac{\exp(\theta_n(s, a_+))}{\sum_{a \in \mathcal{A}_s} \exp(\theta_n(s, a))} \rightarrow 0, \text{ for } n \rightarrow \infty.$$

564 Using Lemma B.4, i.e.  $\theta_n(s, a_+)$  is strictly increasing for  $n > N_1$ , we imply that  $\exp(\theta_n(s, a_+))$  is  
 565 strictly increasing for  $n > N_1$ . This implies that

$$\sum_{a \in \mathcal{A}_s} \exp(\theta_n(s, a)) \rightarrow \infty, \text{ for } n \rightarrow \infty.$$

566 Again by Lemma B.3 we know that

$$\sum_{a \in I_0^s} \pi^{\theta_n}(a|s) \rightarrow 1, \text{ for } n \rightarrow \infty,$$

567 i.e. by definition

$$\sum_{a \in I_0^s} \frac{\exp(\theta_n(s, a))}{\sum_{a' \in \mathcal{A}_s} \exp(\theta_n(s, a'))} \rightarrow 1, \text{ for } n \rightarrow \infty.$$

568 As  $\sum_{a' \in \mathcal{A}_s} \exp(\theta_n(s, a')) \rightarrow \infty$  it follows that

$$\sum_{a \in I_0^s} \exp(\theta_n(s, a)) \rightarrow \infty, \text{ for } n \rightarrow \infty$$

569 implying

$$\max_{a \in I_0^s} \theta_n(s, a) \rightarrow \infty, \text{ for } n \rightarrow \infty.$$

570 For the second claim it holds that

$$\begin{aligned} \sum_{a \in \mathcal{A}_s} \frac{\partial J_h(\theta_n)}{\partial \theta_n(s, a)} &= \mu_h(s) \sum_{a \in \mathcal{A}} \pi^{\theta_n}(a|s) (Q_h(s, a) - J_{h,s}(\theta_n)) \\ &= \mu_h(s) (\mathbb{E}_{S_h=s}^{\pi^{\theta_n}} [Q_h(S_h, A_h)] - J_{h,s}(\theta_n)) \\ &= \mu_h(s) (J_{h,s}(\theta_n) - J_{h,s}(\theta_n)) \\ &= 0. \end{aligned}$$

571 By induction, we obtain  $\sum_{a \in \mathcal{A}_s} \theta_n(s, a) = \sum_{a \in \mathcal{A}_s} \theta_0(s, a) := c$  for every  $n > 0$  and hence

$$\min_{a \in \mathcal{A}_s} \theta_n(s, a) < \sum_{a \in \mathcal{A}_s} \theta_n(s, a) - \max_{a \in \mathcal{A}_s} \theta_n(s, a) = - \max_{a \in \mathcal{A}_s} \theta_n(s, a) + c.$$

572 Since  $\max_{a \in \mathcal{A}_s} \theta_n(s, a) \rightarrow \infty$ , because  $\max_{a \in I_0^s} \theta_n(s, a) \rightarrow \infty$ , we conclude  $\min_{a \in \mathcal{A}_s} \theta_n(s, a) \rightarrow$   
 573  $-\infty$  for  $n \rightarrow \infty$ .  $\square$

574 **Lemma B.6.** Suppose  $a_+ \in I_+^s$ . If there exists  $a \in I_0^s$  such that for some  $n > 0$ ,  $\pi^{\theta_n}(a|s) \leq$   
 575  $\pi^{\theta_n}(a_+|s)$ , then for all  $m > n$  it holds that  $\pi^{\theta_m}(a|s) \leq \pi^{\theta_m}(a_+|s)$ .

576 *Proof.* Suppose there exists  $a \in I_0^s$  such that for an  $n > 0$ ,  $\pi^{\theta_n}(a|s) \leq \pi^{\theta_n}(a_+|s)$ . We show that  
 577  $\pi^{\theta_{n+1}}(a|s) \leq \pi^{\theta_{n+1}}(a_+|s)$ , then the claim follows by induction. We have

$$\begin{aligned} \frac{\partial J_h(\theta_n)}{\partial \theta_n(s, a)} &= \mu_h(s) \pi^{\theta_n}(a|s) (Q_h(s, a) - J_{h,s}(\theta_n)) \\ &\leq \mu_h(s) \pi^{\theta_n}(a_+|s) (Q_h(s, a_+) - J_{h,s}(\theta_n)) \\ &= \frac{\partial J_h(\theta_n)}{\partial \theta_n(s, a_+)}, \end{aligned}$$

578 where the inequality follows with

$$\begin{aligned} Q_h(s, a_+) &= Q_h(s, a_+) - J_{h,s}^\infty + J_{h,s}^\infty \\ &> J_{h,s}^\infty \\ &= Q_h(s, a) - J_{h,s}^\infty + J_{h,s}^\infty \\ &= Q_h(s, a), \end{aligned}$$

579 as  $Q_h(s, a_+) - J_{h,s}^\infty > 0$  a.s. for  $a_+ \in I_+^s$  and  $Q_h(s, a) - J_{h,s}^\infty = 0$  a.s. for  $a \in I_0^s$ . Now by  
580 assumption we have  $\pi^{\theta_n}(a|s) \leq \pi^{\theta_n}(a_+|s)$  and thus  $\theta_n(s, a) \leq \theta_n(s, a_+)$ . It follows

$$\theta_{n+1}(s, a) = \theta_n(s, a) + \eta_h \frac{\partial J_h(\theta_n)}{\partial \theta_n(s, a)} \leq \theta_n(s, a_+) + \eta_h \frac{\partial J_h(\theta_n)}{\partial \theta_n(s, a_+)} = \theta_{n+1}(s, a_+).$$

581

□

582 Now define for every  $a_+ \in I_+^s$  the set

$$B_0^s(a_+) = \{a \in I_0^s | \pi^{\theta_n}(a_+|s) \leq \pi^{\theta_n}(a|s) \text{ for all } l > 0\}$$

583 and denote its complement in  $I_0^s$  as  $\bar{B}_0^s(a_+) = I_0^s \setminus B_0^s(a_+)$ .

584 **Lemma B.7.** Suppose  $I_+^s \neq \emptyset$ . For all  $a_+ \in I_+^s$ , we have that  $B_0^s(a_+) \neq \emptyset$  and

$$\sum_{a \in B_0^s(a_+)} \pi^{\theta_n}(a|s) \rightarrow 1, \text{ as } n \rightarrow \infty.$$

585 This implies:

$$\max_{a \in B_0^s(a_+)} \theta_n(s, a) \rightarrow \infty, \text{ for } n \rightarrow \infty.$$

586 *Proof.* Let  $a_+ \in I_+^s$  and consider  $a \in \bar{B}_0^s(a_+)$ . Then by definition of  $\bar{B}_0^s(a_+)$  there exists  $n' > 0$   
587 such that  $\pi^{\theta_{n'}}(a_+|s) \geq \pi^{\theta_{n'}}(a|s)$ . Hence, by Lemma B.6 for all  $n \geq n'$  we have  $\pi^{\theta_n}(a_+|s) \geq$   
588  $\pi^{\theta_n}(a|s)$ . As  $\pi^{\theta_n}(a_+|s) \rightarrow 0$  for  $n \rightarrow \infty$ . We obtain  $\pi^{\theta_n}(a|s) \rightarrow 0$  for  $n \rightarrow \infty$ , for all  $a \in \bar{B}_0^s(a_+)$ .  
589 Since by Lemma B.3  $\sum_{a \in I_0^s} \pi^{\theta_n}(a|s) \rightarrow 1$  for  $n \rightarrow \infty$ , we have that  $B_0^s(a_+) \neq \emptyset$  and that  
590  $\sum_{a \in B_0^s(a_+)} \pi^{\theta_n}(a|s) \rightarrow 1$ , as  $n \rightarrow \infty$ . The second claim follows from this as in Lemma B.5. □

591 **Lemma B.8.** Consider  $s \in \mathcal{S}_h$  such that  $I_+^s \neq \emptyset$ . Then, for any  $a_+ \in I_+^s$ , there exists an  $N_{a_+}$  such  
592 that for all  $n > N_{a_+}$  we have

$$\pi^{\theta_n}(a_+|s) > \pi^{\theta_n}(a|s) \text{ for all } a \in \bar{B}_0^s(a_+).$$

593 *Proof.* For every  $a \in \bar{B}_0^s(a_+)$  exists time  $n_a$  such that

$$\pi^{\theta_n}(a_+|s) > \pi^{\theta_n}(a|s) \text{ for all } a \in \bar{B}_0^s(a_+)$$

594 for all  $n > n_a$  by definition. Set  $N_{a_+} = \max_{a \in \bar{B}_0^s(a_+)} n_a$  and the proof is completed. □

595 **Lemma B.9.** Assume again  $I_+^s \neq \emptyset$ . For all actions  $a \in I_+^s$ , we have that  $\theta_n(s, a)$  is bounded from  
596 below as  $n \rightarrow \infty$ . And for all  $a \in I_-^s$ , we have that  $\theta_n(s, a) \rightarrow -\infty$  as  $n \rightarrow \infty$ .

597 *Proof.* The first claim follows directly with Lemma B.4 as  $\theta_n(s, a)$  is strictly increasing for all  
598  $a \in I_+^s$ ,  $n > N_1$  and thus for all  $n > N_1$  we have  $\theta_n(s, a) \geq \theta_{N_1}(s, a)$ . Now suppose  $a \in I_-^s$ ,  
599 then by Lemma B.4 we have that  $\theta_n(s, a)$  is strictly decreasing for  $n > N_1$ . Assume there exists  
600  $b$  such that  $\lim_{n \rightarrow \infty} \theta_n(s, a) = b$ , then  $\theta_n(s, a) > b$  for all  $n > N_1$ . By Lemma B.5 there exists an  
601 action  $a' \in \mathcal{A}_s$  such that  $\theta_n(s, a') \rightarrow -\infty$  for  $n \rightarrow \infty$ . Consider  $\delta > 0$  such that  $\theta_{N_1}(s, a') \geq b - \delta$ .  
602 Define for all  $n > N_1$

$$\tau(n) = \max\{k \in (N_1, n] : \theta_k(s, a') \geq b - \delta\}.$$



603 Define also

$$\mathcal{T}^{(n)} = \left\{ \tau(n) < n' < n : \frac{\partial J_h(\theta_{n'})}{\partial \theta_{n'}(s, a')} \leq 0 \right\},$$

604 as the set of all indices  $n'$  in  $(\tau(n), n)$ , where  $\theta_{n'}(s, a')$  is decreasing. Next we define  $Z_n :=$

605  $\sum_{n' \in \mathcal{T}^{(n)}} \frac{\partial J_h(\theta_{n'})}{\partial \theta_{n'}(s, a')}$ , then it holds that

$$\begin{aligned} Z_n &= \sum_{n' \in \mathcal{T}^{(n)}} \frac{\partial J_h(\theta_{n'})}{\partial \theta_{n'}(s, a')} \\ &\leq \sum_{n'=\tau(n)+1}^{n-1} \frac{\partial J_h(\theta_{n'})}{\partial \theta_{n'}(s, a')} \\ &\leq \sum_{n'=\tau(n)}^{n-1} \frac{\partial J_h(\theta_{n'})}{\partial \theta_{n'}(s, a')} + \left| \frac{\partial J_h(\theta_{\tau(n)})}{\partial \theta_{\tau(n)}(s, a')} \right|. \end{aligned}$$

606 By Lemma 3.2 and the bounded reward assumption we have

$$\left| \frac{\partial J_h(\theta_{\tau(n)})}{\partial \theta_{\tau(n)}(s, a')} \right| = \mu_h(s) \pi^{\theta_{\tau(n)}}(a'|s) |A_h^{\theta_{\tau(n)}}(s, a')| \leq (H-h)R^*.$$

607 Hence,

$$\begin{aligned} Z_n &\leq \sum_{n'=\tau(n)}^{n-1} \frac{\partial J_h(\theta_{n'})}{\partial \theta_{n'}(s, a')} + (H-h)R^* \\ &= \frac{1}{\eta} (\theta_n(s, a') - \theta_{\tau(n)}(s, a')) + (H-h)R^* \\ &\leq \frac{1}{\eta} (\theta_n(s, a') - b + \delta) + (H-h)R^*. \end{aligned}$$

608 Then  $\theta_n(s, a') \rightarrow -\infty$  for  $n \rightarrow \infty$  implies that  $Z_n \rightarrow -\infty$  for  $n \rightarrow \infty$ . As we chose  $a \in I_-^s$  it

609 holds that  $|A_h^{\theta_n}(s, a)| \geq \frac{\Delta}{4}$  for  $n > N_1$  with Lemma B.2 and so for all  $n' \in \mathcal{T}^{(n)}$ :

$$\begin{aligned} \left| \frac{\frac{\partial J_h(\theta_{n'})}{\partial \theta_{n'}(s, a)}}{\frac{\partial J_h(\theta_{n'})}{\partial \theta_{n'}(s, a')}} \right| &= \left| \frac{\pi^{\theta_{n'}}(a|s) A_h^{\theta_{n'}}(s, a)}{\pi^{\theta_{n'}}(a'|s) A_h^{\theta_{n'}}(s, a')} \right| \\ &\geq \frac{\pi^{\theta_{n'}}(a|s)}{\pi^{\theta_{n'}}(a'|s)} \frac{\Delta}{4(H-h)R^*} \\ &= \exp(\theta_{n'}(s, a) - \theta_{n'}(s, a')) \frac{\Delta}{4(H-h)R^*} \\ &\geq \exp(b - (b - \delta)) \frac{\Delta}{4(H-h)R^*} \\ &= \exp(\delta) \frac{\Delta}{4(H-h)R^*}, \end{aligned}$$

610 where we used in the last inequality that  $\theta_{n'}(s, a') \leq b - \delta$  for all  $n' > \tau(n)$  and  $\theta_{n'}(s, a) > b$  for  
611 all  $n' > N_1$ . By the definition of  $\mathcal{T}^{(n)}$  these inequalities holds especially for all  $n' \in \mathcal{T}^{(n)}$ . Using

612 this we can imply that for all  $n > N_1$  with  $\mathcal{T}^{(n)} \neq \emptyset$ ,

$$\begin{aligned}
\frac{1}{\eta} \left( \theta_{N_1}(s, a) - \theta_n(s, a) \right) &= \sum_{n'=N_1+1}^{n-1} \frac{\partial J_h(\theta_{n'})}{\partial \theta_{n'}(s, a)} \\
&\leq \sum_{n' \in \mathcal{T}^{(n)}} \frac{\partial J_h(\theta_{n'})}{\partial \theta_{n'}(s, a)} \\
&\leq \exp(\delta) \frac{\Delta}{4(H-h)R^*} \sum_{n' \in \mathcal{T}^{(n)}} \frac{\partial J_h(\theta_{n'})}{\partial \theta_{n'}(s, a)} \\
&= \exp(\delta) \frac{\Delta}{4(H-h)R^*} Z_n,
\end{aligned}$$

613 where the first inequality holds because  $\theta_{n'}(s, a)$  is strictly decreasing for  $n' > N_1$ , i.e.  $\frac{\partial J_h(\theta_{n'})}{\partial \theta_{n'}(s, a)} > 0$   
614 for all  $n' \in \{N_1 + 1, \dots, n-1\}$ . In the second inequality we used

$$\left| \frac{\frac{\partial J_h(\theta_{n'})}{\partial \theta_{n'}(s, a)}}{\frac{\partial J_h(\theta_{n'})}{\partial \theta_{n'}(s, a')}} \right| \geq \exp(\delta) \frac{\Delta}{4(H-h)R^*}.$$

615 Note that  $\frac{\partial J_h(\theta_{n'})}{\partial \theta_{n'}(s, a)} < 0$  and  $\frac{\partial J_h(\theta_{n'})}{\partial \theta_{n'}(s, a')} < 0$  so that the sign of the inequality reverses.

616 Finally, we deduce from  $Z_n \rightarrow -\infty$  that  $\theta_n(s, a) \rightarrow \infty$  for  $n \rightarrow \infty$ , which is a contradiction to  
617  $\theta_n(s, a)$  strictly decreasing for all  $n > N_1$ .  $\square$

618 **Lemma B.10.** Consider  $s \in \mathcal{S}_h$  such that  $I_+^s \neq \emptyset$ . Then for any  $a_+ \in I_+^s$  it holds that

$$\sum_{a \in B_0^s(a_+)} \theta_n(s, a) \rightarrow \infty, \quad \text{for } n \rightarrow \infty.$$

619 *Proof.* Let  $a_+ \in I_+^s$  and  $a \in B_0^s(a_+)$ . Then by definition of  $B_0^s(a_+)$  we have

$$\pi^{\theta_n}(a_+|s) \leq \pi^{\theta_n}(a|s)$$

620 for all  $n > 0$  and hence by softmax parametrization  $\theta_n(s, a_+) \leq \theta_n(s, a)$  for all  $n > 0$ . By  
621 Lemma B.9 we have that  $\theta_n(s, a_+)$  and thus also  $\theta_n(s, a)$  is bounded from below for  $n \rightarrow \infty$ .  
622 Together with

$$\max_{\{a \in B_0^s(a_+)\}} \theta_n(s, a) \rightarrow \infty, \quad \text{for } n \rightarrow \infty$$

623 by Lemma B.7 we deduce the claim.  $\square$

624 Finally, we are ready to prove the asymptotic convergence of policy gradient with tabular softmax  
625 parametrization.

626 *Proof of Theorem 3.5.* We have to show that  $I_+^s = \emptyset$  for all  $s \in \mathcal{S}_h$ . So assume there exists  $s \in \mathcal{S}_h$   
627 such that  $I_+^s \neq \emptyset$  and let  $a_+ \in I_+^s$ . Then by Lemma B.10 we have

$$\sum_{a \in B_0^s(a_+)} \theta_n(s, a) \rightarrow \infty, \quad \text{for } n \rightarrow \infty. \tag{15}$$

628 For any  $a \in I_-^s$  we have by Lemma B.9 that

$$\frac{\pi^{\theta_n}(a|s)}{\pi^{\theta_n}(a_+|s)} = \exp\left( \underbrace{\theta_n(s, a)}_{\rightarrow -\infty} - \underbrace{\theta_n(s, a_+)}_{\text{bounded from below}} \right) \rightarrow 0, \quad n \rightarrow \infty.$$

629 Hence, there exists  $N_2 > N_1$  such that for all  $n > N_2$

$$\frac{\pi^{\theta_n}(a|s)}{\pi^{\theta_n}(a_+|s)} < \frac{\Delta}{16|\mathcal{A}|(H-h)R^*},$$

630 which leads for  $n > N_2$  to

$$-(H-h)R^* \sum_{a \in I_-^s} \pi^{\theta_n}(a|s) > -\frac{\Delta}{16} \pi^{\theta_n}(a_+|s). \quad (16)$$

631 Note that if  $I_-^s = \emptyset$  we can just ignore this sum later on.

632 Next consider  $a \in \bar{B}_0^s(a_+) \subseteq I_0^s$ . By the definition of  $I_0^s$  we have that  $A_h^{\theta_n}(s, a) \rightarrow A_h^\infty(s, a) = 0$   
 633 for  $n \rightarrow \infty$ . By Lemma B.8 we have for  $n \geq N_{a_+}$

$$1 < \frac{\pi^{\theta_n}(a_+|s)}{\pi^{\theta_n}(a|s)}.$$

634 Thus, there exists  $N_3 > \max\{N_2, N_{a_+}\}$  such that for all  $n \geq N_3$

$$|A_h^{\theta_n}(s, a)| < \frac{\pi^{\theta_n}(a_+|s)}{\pi^{\theta_n}(a|s)} \frac{\Delta}{16|\mathcal{A}|}.$$

635 This implies

$$\sum_{a \in \bar{B}_0^s(a_+)} \pi^{\theta_n}(a|s) |A_h^{\theta_n}(s, a)| < \pi^{\theta_n}(a_+|s) \frac{\Delta}{16}$$

636 and so

$$-\pi^{\theta_n}(a_+|s) \frac{\Delta}{16} < \sum_{a \in \bar{B}_0^s(a_+)} \pi^{\theta_n}(a|s) A_h^{\theta_n}(s, a) < \pi^{\theta_n}(a_+|s) \frac{\Delta}{16}, \quad (17)$$

637 for all  $n > N_3$ . We can conclude again for  $n > N_3$ ,

$$\begin{aligned} 0 &= \sum_{a \in \mathcal{A}} \pi^{\theta_n}(a|s) A_h^{\theta_n}(s, a) \\ &= \sum_{a \in B_0^s(a_+)} \pi^{\theta_n}(a|s) A_h^{\theta_n}(s, a) + \sum_{a \in \bar{B}_0^s(a_+)} \pi^{\theta_n}(a|s) A_h^{\theta_n}(s, a) \\ &\quad + \sum_{a \in I_+^s} \pi^{\theta_n}(a|s) A_h^{\theta_n}(s, a) + \sum_{a \in I_-^s} \pi^{\theta_n}(a|s) A_h^{\theta_n}(s, a) \\ &> \sum_{a \in B_0^s(a_+)} \pi^{\theta_n}(a|s) A_h^{\theta_n}(s, a) - \pi^{\theta_n}(a_+|s) \frac{\Delta}{16} + \pi^{\theta_n}(a_+|s) \frac{\Delta}{4} - (H-h)R^* \sum_{a \in I_-^s} \pi^{\theta_n}(a|s) \\ &\geq \sum_{a \in B_0^s(a_+)} \pi^{\theta_n}(a|s) A_h^{\theta_n}(s, a) - \pi^{\theta_n}(a_+|s) \frac{\Delta}{16} + \pi^{\theta_n}(a_+|s) \frac{\Delta}{4} - \frac{\Delta}{16} \pi^{\theta_n}(a_+|s) \\ &> \sum_{a \in B_0^s(a_+)} \pi^{\theta_n}(a|s) A_h^{\theta_n}(s, a), \end{aligned}$$

638 where we used Equation (17) and Lemma B.2 in the first inequality and Equation (16) in the second  
 639 inequality. Finally, by our assumption and Equation (15) for  $n > N_3$ ,

$$\begin{aligned} &\infty \xleftarrow{n \rightarrow \infty} \sum_{a \in B_0^s(a_+)} (\theta_n(s, a) - \theta_{N_3}(s, a)) \\ &= \eta_h \sum_{n'=N_3}^n \sum_{a \in B_0^s(a_+)} \frac{\partial J_h(\theta_n)}{\partial \theta_{n'}(s, a)} \\ &= \eta_h \sum_{n'=N_3}^n \mu_h(s) \sum_{a \in B_0^s(a_+)} \pi^{\theta_n}(a|s) A_h^{\theta_n}(s, a), \end{aligned}$$

640 which contradicts  $\sum_{a \in B_0^s(a_+)} \pi^{\theta_n}(a|s) A_h^{\theta_n}(s, a) < 0$ . □

641 **B.2 Proofs of Section 3.2**

642 **Lemma 3.6** (weak PL-inequality). *For the objective  $J_h$  it holds that*

$$\|\nabla J_h(\theta)\|_2 \geq \min_{s \in \mathcal{S}_h} \pi^\theta(a_h^*(s)|s)(J_h^* - J_h(\theta)),$$

643 where  $a_h^*(s) = \operatorname{argmax}_{a \in \mathcal{A}_s} \pi_h^*(a|s)$  and  $J_h^* = \sup_\theta J_h(\theta)$ .

644 *Proof.* First note that by the definition of  $\pi_h^*$ , we have  $J_h^* = V_h^{(\pi_h^*, \tilde{\pi}^{(h+1)})}(\mu)$ , because the tabular  
 645 softmax parametrization can approximate any deterministic policy arbitrarily well. We denote by  
 646  $J_{h,s}^* = V_h^{(\pi_h^*, \tilde{\pi}^{(h+1)})}(s)$  the optimal  $h$ -state value function for all  $s \in \mathcal{S}_h$ , when the policy after  $h$  is  
 647 fixed. Using the performance difference lemma with fixed policy after  $h$  (Corollary 2.3), we obtain

$$\begin{aligned} & \left\| \frac{\partial J_h(\theta)}{\partial \theta} \right\|_2 \\ &= \left\| \sum_{s \in \mathcal{S}_h} \mu_h(s) \frac{\partial J_{h,s}(\theta)}{\partial \theta} \right\|_2 \\ &= \left[ \sum_{s' \in \mathcal{S}_h} \sum_{a' \in \mathcal{A}_{s'}} \left( \sum_{s \in \mathcal{S}_h} \mu_h(s) \frac{\partial J_{h,s}(\theta)}{\partial \theta(s', a')} \right)^2 \right]^{\frac{1}{2}} \\ &\geq \sum_{s \in \mathcal{S}_h} \mu_h(s) \left| \frac{\partial J_{h,s}(\theta)}{\partial \theta(s, a_h^*(s))} \right| \\ &= \sum_{s \in \mathcal{S}_h} \mu_h(s) \pi^\theta(a_h^*(s)|s) A_h^{(\pi^\theta, \tilde{\pi}^{(h+1)})}(s, a_h^*(s)) \\ &= \sum_{s \in \mathcal{S}_h} \mu_h(s) \pi^\theta(a_h^*(s)|s) (J_{h,s}^* - J_{h,s}(\theta)) \\ &\geq \min_{s \in \mathcal{S}_h} \pi^\theta(a_h^*(s)|s) (J_h^* - J_h(\theta)), \end{aligned}$$

648 where the first inequality is due to the positiveness of all other terms, and we just drop them, and in  
 649 the last equation we used Corollary 2.3, i.e.  $A_h^{(\pi^\theta, \tilde{\pi}^{(h+1)})}(s, a_h^*(s)) = \mathbb{E}_{S_h=s}^{\pi^*} [A_h^{(\pi^\theta, \tilde{\pi}^{(h+1)})}(S_t, A_t)]$ .  
 650 This proves the claim.  $\square$

651 **Lemma 3.7.** *Let  $h \in \mathcal{H}$ ,  $\mu_h(s) > 0$  for all  $s \in \mathcal{S}_h$  and consider the sequence  $(\theta_n)_{n \in \mathbb{N}_0}$  generated by  
 652 (7) for arbitrarily initialized  $\theta_0 \in \mathbb{R}^{d_h}$ . Then it holds that  $c_h := \inf_{n \geq 0} \min_{s \in \mathcal{S}_h} \pi^{\theta_n}(a_h^*(s)|s) > 0$ .*

653 All in all the proof follows the outline of (Mei et al., 2020, Lemma 9), but has to be adjusted to the  
 654 finite-time setting in a few steps.

655 *Proof.* First note that

$$J_{h,s}(\theta) = \sum_{a \in \mathcal{A}_s} \pi_t^\theta(a|s) Q_h^{\tilde{\pi}}(s, a),$$

656 where  $Q_h^{\tilde{\pi}}(s, a)$  is independent of  $\theta$ . We will drop the subscript  $\tilde{\pi}$  in  $Q_h$  for the rest of the proof and  
 657 define for all  $s \in \mathcal{S}_h$ ,

$$\Delta^*(s) = Q_h(s, a_h^*(s)) - \max_{a \neq a_h^*(s)} Q_h(s, a) > 0, \quad \text{and} \quad \Delta^* = \min_{s \in \mathcal{S}_h} \Delta^*(s) > 0.$$

658 Now consider for any  $s \in \mathcal{S}_h$  the following sets

$$\begin{aligned} \mathcal{R}_1(s) &= \left\{ \theta : \frac{\partial J_{h,s}(\theta)}{\partial \theta(s, a_h^*(s))} \geq \frac{\partial J_{h,s}(\theta)}{\partial \theta(s, a)}, \text{ for all } a \neq a_h^*(s) \right\}, \\ \mathcal{R}_2(s) &= \left\{ \theta_n : J_{h,s}(\theta_{n'}) \geq Q_h(s, a_h^*(s)) - \frac{\Delta^*(s)}{2}, \text{ for all } n' \geq n \right\}. \end{aligned}$$

659 Furthermore, we define  $c(s) = \frac{|\mathcal{A}|(H-h)R^*}{\Delta^*(s)} - 1$  and

$$N_c(s) = \left\{ \theta : \pi^\theta(a_h^*(s)|s) \geq \frac{c(s)}{c(s)+1} \right\}.$$

660 We divide the proof into the following Claims:

661 **Claim 1.**  $\mathcal{R}(s) = \mathcal{R}_1(s) \cap \mathcal{R}_2(s)$  is a *nice* region, i.e.

- 662 (i)  $\theta_n \in \mathcal{R}(s) \Rightarrow \theta_{n+1} \in \mathcal{R}(s)$ .  
 663 (ii)  $\pi^{\theta_{n+1}}(a_h^*(s)|s) \geq \pi^{\theta_n}(a_h^*(s)|s)$ .

664 **Claim 2.**  $\mathcal{N}_c(s) \cap \mathcal{R}_2(s) \subseteq \mathcal{R}_1(s) \cap \mathcal{R}_2(s)$ .

665 **Claim 3.** For every  $s \in \mathcal{S}_h$ , there exists a finite-time  $n_0(s) \geq 1$ , such that  $\theta_{n_0(s)} \in \mathcal{N}_c(s) \cap \mathcal{R}_2(s) \subseteq$   
 666  $\mathcal{R}_1(s) \cap \mathcal{R}_2(s)$  and thus  $\inf_{n \geq 1} \pi^{\theta_n}(a_h^*(s)|s) = \min_{1 \leq n \leq n_0(s)} \pi^{\theta_{n_0(s)}}(a_h^*(s)|s)$ .

667 If all three claims hold true, we can finally define  $n_0 = \max_{s \in \mathcal{S}_h} n_0(s)$ , such that

$$\inf_{n \geq 1, s \in \mathcal{S}_h} \pi^{\theta_n}(a_h^*(s)|s) = \min_{1 \leq n \leq n_0, s \in \mathcal{S}_h} \pi^{\theta_{n_0}}(a_h^*(s)|s).$$

668 Due to the positiveness of the softmax parametrization the assertion follows.

669 **Claim 1.** We first prove (i). Let  $\theta_n \in \mathcal{R}(s)$  and  $a \neq a_h^*(s)$ . Then  $\theta_{n+1} \in \mathcal{R}_2(s)$  by definition of  
 670  $\mathcal{R}_2(s)$ . Using Lemma 3.2 we obtain

$$\begin{aligned} \frac{\partial J_{h,s}(\theta_n)}{\partial \theta(s, a_h^*(s))} &\geq \frac{\partial J_{h,s}(\theta_n)}{\partial \theta(s, a)} \\ \Leftrightarrow \pi^{\theta_n}(a_h^*(s)|s)(Q_h(s, a_h^*(s)) - J_{h,s}(\theta_n)) &\geq \pi^{\theta_n}(a|s)(Q_h(s, a) - J_{h,s}(\theta_n)). \end{aligned} \quad (18)$$

671 We divide into two cases:

- 672 a)  $\pi^{\theta_n}(a_h^*(s)|s) \geq \pi^{\theta_n}(a|s)$ ,  
 673 b)  $\pi^{\theta_n}(a_h^*(s)|s) < \pi^{\theta_n}(a|s)$ .

674 In a) the assumption  $\pi^{\theta_n}(a_h^*(s)|s) \geq \pi^{\theta_n}(a|s)$  implies  $\theta_n(s, a_h^*(s)) \geq \theta_n(s, a)$ . Thus,

$$\begin{aligned} \theta_{n+1}(s, a_h^*(s)) &= \theta_n(s, a_h^*(s)) + \eta_h \frac{\partial J_{h,s}(\theta_n)}{\partial \theta_n(s, a_h^*(s))} \\ &\geq \theta_n(s, a) + \eta_h \frac{\partial J_{h,s}(\theta_n)}{\partial \theta_n(s, a)} \\ &= \theta_{n+1}(s, a), \end{aligned}$$

675 which implies  $\pi^{\theta_{n+1}}(a_h^*(s)|s) \geq \pi^{\theta_{n+1}}(a|s)$ . By the optimality of  $a_h^*(s)$  we follow

$$\pi_t^{\theta_{n+1}}(a_h^*(s)|s)(Q_h(s, a_h^*(s)) - J_{h,s}(\theta_{n+1})) \geq \pi_t^{\theta_{n+1}}(a|s)(Q_h(s, a) - J_{h,s}(\theta_{n+1})),$$

676 which is by equation (18) equivalent to

$$\frac{\partial J_{h,s}(\theta_{n+1})}{\partial \theta_{n+1}(s, a_h^*(s))} \geq \frac{\partial J_{h,s}(\theta_{n+1})}{\partial \theta_{n+1}(s, a)}.$$

677 Hence,  $\theta_{n+1} \in \mathcal{R}_1(s)$ .

678 In b) assume now that  $\pi^{\theta_n}(a_h^*(s)|s) < \pi^{\theta_n}(a|s)$ . As  $\theta_n \in \mathcal{R}_1(s)$  equation (18) is also true in this  
 679 case and rearranging of terms gives

$$\begin{aligned} \frac{\partial J_{h,s}(\theta_n)}{\partial \theta_n(s, a_h^*(s))} &\geq \frac{\partial J_{h,s}(\theta_n)}{\partial \theta_n(s, a)} \\ \Leftrightarrow Q_h(s, a_h^*(s)) - Q_h(s, a) &\geq \left(1 - \frac{\pi^{\theta_n}(a_h^*(s)|s)}{\pi^{\theta_n}(a|s)}\right)(Q_h(s, a_h^*(s)) - J_{h,s}(\theta_n)) \\ \Leftrightarrow Q_h(s, a_h^*(s)) - Q_h(s, a) &\geq (1 - \exp(\theta_n(s, a_h^*(s)) - \theta_n(s, a)))(Q_h(s, a_h^*(s)) - J_{h,s}(\theta_n)). \end{aligned} \quad (19)$$

680 Note next that by  $\theta^{(n)} \in \mathcal{R}_1(s)$  and definition of  $\mathcal{R}_1(s)$  we have

$$\begin{aligned} & \theta_{n+1}(s, a_h^*(s)) - \theta_{n+1}(s, a) \\ &= \theta_n(s, a_h^*(s)) + \eta_h \frac{\partial J_{h,s}(\theta_n)}{\partial \theta_n(s, a_h^*(s))} - \theta_n(s, a) - \eta \frac{\partial J_{h,s}(\theta_n)}{\partial \theta_n(s, a)} \\ &\geq \theta_n(s, a_h^*(s)) - \theta_n(s, a) \end{aligned}$$

681 and it follows  $(1 - \exp(\theta_{n+1}(s, a_h^*(s)) - \theta_{n+1}(s, a))) \leq (1 - \exp(\theta_n(s, a_h^*(s)) - \theta_n(s, a))) < 1$  by  
682 assumption b). We already know  $\theta_{n+1} \in \mathcal{R}_2(s)$  and therefore  $J_{h,s}(\theta_{n+1}) \geq Q_h(s, a_h^*(s)) - \frac{\Delta^*(s)}{2}$ .  
683 This leads to

$$Q_h(s, a_h^*(s)) - J_{h,s}(\theta_{n+1}) \leq \frac{\Delta^*(s)}{2} \leq Q_h(s, a_h^*(s)) - Q_h(s, a),$$

684 where the last inequality is due to the definition of  $\Delta^*(s)$ . Combining everything leads to

$$\begin{aligned} & (1 - \exp(\theta_{n+1}(s, a_h^*(s)) - \theta_{n+1}(s, a))) \left[ Q_h(s, a_h^*(s)) - J_{h,s}(\theta_{n+1}) \right] \\ & \leq Q_h(s, a_h^*(s)) - Q_h(s, a), \end{aligned}$$

685 which is by equation (19) equivalent to  $\theta_{n+1} \in \mathcal{R}_1(s)$ .

686 Now we come to Claim (ii).

$$\begin{aligned} & \pi^{\theta_{n+1}}(a_h^*(s)|s) \\ &= \frac{\exp(\theta_{n+1}(s, a_h^*(s)))}{\sum_{a \in \mathcal{A}} \exp(\theta_{n+1}(s, a))} \\ &= \frac{\exp(\theta_n(s, a_h^*(s)) + \eta_h \frac{\partial J_{h,s}(\theta_n)}{\partial \theta_n(s, a_h^*(s))})}{\sum_{a \in \mathcal{A}_s} \exp(\theta_n(s, a) + \eta_h \frac{\partial J_{h,s}(\theta_n)}{\partial \theta_n(s, a)})} \\ &\geq \frac{\exp(\theta_n(s, a_h^*(s))) \exp(\eta_h \frac{\partial J_{h,s}(\theta_n)}{\partial \theta_n(s, a_h^*(s))})}{\sum_{a \in \mathcal{A}_s} \exp(\theta_n(s, a)) \exp(\eta_h \frac{\partial J_{h,s}(\theta_n)}{\partial \theta_n(s, a_h^*(s))})} \\ &= \pi^{\theta_n}(a_h^*(s)|s), \end{aligned}$$

687 where the inequality follows by  $\theta_n \in \mathcal{R}_1(s)$ .

688 **Claim 2.** Assume  $\theta \in \mathcal{N}_c(s) \cap \mathcal{R}_2(s)$  and divide again in two cases. If a)  $\pi^\theta(a_h^*(s)|s) \geq$   
689  $\max_{a \in \mathcal{A}} \pi^\theta(a|s)$ , then for all  $a \neq a_h^*(s)$  we have

$$\begin{aligned} & \frac{\partial J_h(\theta)}{\partial \theta(s, a_h^*(s))} \\ &= \mu_h(s) \pi^\theta(a_h^*(s)|s) A^{\pi^\theta}(s, a_h^*(s)) \\ &\geq \mu_h(s) \pi^\theta(a|s) A^{\pi^\theta}(s, a) \\ &= \frac{\partial J_h(\theta)}{\partial \theta(s, a)}. \end{aligned}$$

690 Hence,  $\theta \in \mathcal{R}_1(s)$ .

691 The case b) where  $\pi^\theta(a_h^*(s)|s) < \max_{a \in \mathcal{A}_s} \pi^\theta(a|s)$  is not possible for  $\theta \in \mathcal{N}_c(s)$ . Assume there exists  
692  $a \neq a_h^*(s)$  such that  $\pi^\theta(a_h^*(s)|s) < \pi^\theta(a|s)$ . Then

$$\pi^\theta(a_h^*(s)|s) + \pi^\theta(a|s) > \frac{2c(s)}{c(s) + 1} = \frac{2|\mathcal{A}|(H-h)R^*}{|\mathcal{A}|(H-h)R^* + \Delta^*(s)} - 2 = 2 - \frac{2\Delta^*(s)}{|\mathcal{A}|(H-h)R^*} \geq 2 - \frac{2}{|\mathcal{A}|} \geq 1,$$

693 because  $\Delta^*(s) \leq (H-h)R^*$  by definition and  $|\mathcal{A}| \geq 2$ . This is a contradiction as  $\pi^\theta$  is a probability  
694 distribution and Claim 2 is proven.

695 **Claim 3.** By the asymptotic convergence for finite-time setting Theorem 3.5, we have that  
696  $\pi^{\theta_n}(a^*(s)|s) \rightarrow 1$  for  $n \rightarrow \infty$ . Thus, there exists an  $N_0(s) > 0$ , such that  $\pi^{\theta_n}(a^*(s)|s) \geq \frac{c(s)}{c(s)+1}$   
697 for all  $n \geq N_0(s)$ , i.e.  $\theta_n \in N_c(s)$  for all  $n \geq N_0(s)$ .  
698 Furthermore,  $J_h(\theta_n) \rightarrow J_h^* = Q_h(s, a^*(s))$  for  $n \rightarrow \infty$  which implies the existence of  $N_1 > 0$  such  
699 that  $\theta_n \in \mathcal{R}_2(s)$  for all  $n \geq N_1(s)$ . We choose  $n_0(s) = \max\{N_0(s), N_1(s)\}$  which proves Claim 3.  
700  $\square$

701 **Theorem 3.8.** Let  $h \in \mathcal{H}$ ,  $\mu_h(s) > 0$  for all  $s \in \mathcal{S}_h$  and consider the sequence  $(\theta_n)_{n \in \mathbb{N}_0}$  generated  
702 by (7) for arbitrarily initialized  $\theta_0 \in \mathbb{R}^{d_h}$ . Define  $c_h := \inf_{n \geq 0} \min_{s \in \mathcal{S}_h} \pi^{\theta_n}(a_h^*(s)|s) > 0$  by  
703 Lemma 3.7 and choose step size  $\eta_h = \frac{1}{\beta_h}$  with  $\beta_h = 2(H-h)R^*|\mathcal{A}|$ . Then it holds that

$$J_h^* - J_h(\theta_n) \leq \frac{4(H-h)R^*|\mathcal{A}|}{c_h^2 n},$$

704 where  $J_h^* = \sup_{\theta} J_h(\theta)$ .

705 *Proof.* For any  $\beta$ -smooth function  $f : \mathbb{R}^d \rightarrow \mathbb{R}$  the descent lemma gives (see Beck, 2017, Lemma  
706 5.7)

$$f(y) \leq f(x) + \nabla f(x)^T(y-x) + \frac{\beta}{2}\|y-x\|^2.$$

707 As  $-f$  is also  $\beta$ -smooth we follow

$$-f(y) \leq -f(x) - \nabla f(x)^T(y-x) + \frac{\beta}{2}\|y-x\|^2,$$

708 which is equivalent to

$$f(y) \geq f(x) + \nabla f(x)^T(y-x) - \frac{\beta}{2}\|y-x\|^2. \quad (20)$$

709 Now for gradient ascent updates

$$x_{k+1} = x_k + \alpha \nabla f(x_k)$$

710 we have that

$$\begin{aligned} f(x_{k+1}) &\geq f(x_k) + \nabla f(x_k)^T(x_{k+1} - x_k) - \frac{\beta}{2}\|x_{k+1} - x_k\|^2 \\ &= f(x_k) + \alpha \|\nabla f(x_k)\|^2 - \frac{\beta \alpha^2}{2} \|\nabla f(x_k)\|^2 \\ &= f(x_k) + \left(\alpha - \frac{\beta \alpha^2}{2}\right) \|\nabla f(x_k)\|^2. \end{aligned}$$

711 It follows for the maximum  $f(x^*)$  of  $f$  that

$$f(x^*) - f(x_{k+1}) \leq f(x^*) - f(x_k) - \left(\alpha - \frac{\beta \alpha^2}{2}\right) \|\nabla f(x_k)\|^2.$$

712 Using this for our objective function  $J_h$ , we obtain for the gradient ascent updates

$$\theta_{n+1} = \theta_n + \eta_h \nabla J_h(\theta_n)$$

713 and  $J_h^* = \sup_{\theta} J_h(\theta)$  that

$$\begin{aligned} J_h^* - J_h(\theta_{n+1}) &\leq J_h^* - J_h(\theta_n) - \underbrace{\left(\eta_h - \frac{\beta_h \eta_h^2}{2}\right)}_{= \frac{1}{2\beta_h} > 0, \text{ for } \eta_h = \frac{1}{\beta_h}} \underbrace{\|\nabla J_h(\theta_n)\|^2}_{\geq c_h^2 (J_h^* - J_h(\theta_n))^2} \\ &\leq (J_h^* - J_h(\theta_n)) \left(1 - \frac{c_h^2}{2\beta_h} (J_h^* - J_h(\theta_n))\right). \end{aligned}$$

714 The second inequality follows with the PL-type inequality in Lemma 3.6.

715 Define  $q = \frac{c_h^2}{4(H-h)R^*|\mathcal{A}|} = \frac{c_h^2}{2\beta_h} > 0$ , then

$$J_h^* - J_h(\theta_0) \leq (H-h)R^* \leq \frac{1}{q}.$$

716 We conclude using an argument similar to Nesterov (2013, Thm. 2.1.14). Therefore, define  $d_n =$   
717  $J_h^* - J_h(\theta_n)$ , then

$$d_{n+1} \leq d_n - \frac{1}{q}d_n^2.$$

718 Thus,

$$\frac{1}{d_{n+1}} \geq \frac{1}{d_n} + \frac{d_n}{qd_{n+1}} \geq \frac{1}{d_n} + \frac{1}{q},$$

719 where the first inequality is due to dividing by  $d_n d_{n+1}$  and the second inequality follows by mono-  
720 tonicity (Lemma B.1). Using a telescope-sum argument we obtain

$$\frac{1}{d_n} = d_0 + \sum_{k=0}^{n-1} \frac{1}{d_k} - \frac{1}{d_{k-1}} \geq d_0 + \frac{n}{q}.$$

721 Finally,

$$J_h^* - J_h(\theta_n) = d_n \leq \frac{1}{\frac{1}{q}n + d_0} \leq \frac{1}{q(n+1)} \leq \frac{4(H-h)R^*|\mathcal{A}|}{c_h^2 n}.$$

722

□

## 723 C Proofs of Section 4

724 **Lemma C.1.** Consider the tabular softmax parametrization. For any  $h \in \mathcal{H}$  and  $K_0 > 0$  it holds  
725 that

$$\mathbb{E}_{\mu_h}^{(\pi^\theta, (\tilde{\pi})_{(h+1)})} [\widehat{\nabla} J_h^{K_h}(\theta)] = \nabla J_h(\theta)$$

726 and

$$\mathbb{E}_{\mu_h}^{(\pi^\theta, (\tilde{\pi})_{(h+1)})} [\|\widehat{\nabla} J_h^{K_h}(\theta) - \nabla J_h(\theta)\|^2] \leq \frac{5(H-h)^2(R^*)^2}{K_h} =: \frac{C_h}{K}.$$

727 *Proof.* By the definition of  $\widehat{\nabla} J_h^K$  we have

$$\begin{aligned} & \mathbb{E}_{\mu_h}^{(\pi^\theta, (\tilde{\pi})_{(h+1)})} [\widehat{\nabla} J_h^{K_h}(\theta)] \\ &= \mathbb{E}_{\mu_h}^{(\pi^\theta, (\tilde{\pi})_{(h+1)})} \left[ \frac{1}{K_h} \sum_{i=1}^{K_h} \nabla \log(\pi^\theta(A_t^i | S_t^i)) \hat{Q}_h(S_h^i, A_h^i) \right] \\ &= \mathbb{E}_{\mu_h}^{(\pi^\theta, (\tilde{\pi})_{(h+1)})} \left[ \nabla \log(\pi^\theta(A_h^1 | S_h^1)) \hat{Q}_h(S_h^1, A_h^1) \right] \\ &= \mathbb{E}_{\mu_h}^{(\pi^\theta, (\tilde{\pi})_{(h+1)})} \left[ \nabla \log(\pi^\theta(A_1 | S_h)) \sum_{k=h}^{H-1} r(S_k, A_k) \right], \end{aligned}$$

728 where we used that we consider independent samples for  $i = 1, \dots, K_h$ . From the proof of the policy  
729 gradient Theorem 2.2, we obtain that

$$\begin{aligned} & \mathbb{E}_{\mu_h}^{(\pi^\theta, (\tilde{\pi})_{(h+1)})} [\widehat{\nabla} J_h^{K_h}(\theta)] \\ &= \mathbb{E}_{\mu_h}^{(\pi^\theta, (\tilde{\pi})_{(h+1)})} \left[ \nabla \log(\pi^\theta(A_1 | S_h)) \sum_{k=h}^{H-1} r(S_k, A_k) \right] \\ &= \nabla J_h(\theta). \end{aligned}$$



730 For the second claim we have

$$\begin{aligned}
& \mathbb{E}_{\mu_h}^{(\pi^\theta, (\tilde{\pi})_{(h+1)})} \left[ \|\widehat{\nabla} J_h^{K_h}(\theta) - \nabla J_h(\theta)\|^2 \right] \\
& \leq \frac{1}{K_h} \mathbb{E}_{\mu_h}^{(\pi^\theta, (\tilde{\pi})_{(h+1)})} \left[ \|\nabla \log(\pi^\theta(A_h|S_h)) \hat{Q}_h(S_h, A_h) - \nabla J_h(\theta)\|^2 \right] \\
& = \frac{1}{K_h} \mathbb{E}_{\mu_h}^{(\pi^\theta, (\tilde{\pi})_{(h+1)})} \left[ \sum_{s \in \mathcal{S}_h} \sum_{a \in \mathcal{A}_s} \left( \mathbf{1}_{s=S_h} (\mathbf{1}_{a=A_h} - \pi^\theta(a|s)) \sum_{k=h}^{H-1} r(S_k, A_k) \right. \right. \\
& \quad \left. \left. - \mu_h(s) \pi^\theta(a|s) A_h^{(\pi^\theta, (\tilde{\pi})_{(h+1)})}(s, a) \right)^2 \right],
\end{aligned}$$

731 by the definition of  $\widehat{\nabla} J_h^{K_h}(\theta)$  and the derivative of  $\nabla J_h(\theta)$  for the softmax parametrization. Further,

$$\begin{aligned}
& \mathbb{E}_{\mu_h}^{(\pi^\theta, (\tilde{\pi})_{(h+1)})} \left[ \|\widehat{\nabla} J_h^{K_h}(\theta) - \nabla J_h(\theta)\|^2 \right] \\
& \leq \frac{1}{K_h} \mathbb{E}_{\mu_h}^{(\pi^\theta, (\tilde{\pi})_{(h+1)})} \left[ \sum_{a \in \mathcal{A}_s} (\mathbf{1}_{a=A_h} - \pi^\theta(a|S_h))^2 \left( \sum_{k=h}^{H-1} r(S_k, A_k) \right)^2 \right. \\
& \quad - 2 \sum_{a \in \mathcal{A}_s} (\mathbf{1}_{a=A_h} - \pi^\theta(a|S_h)) \sum_{k=h}^{H-1} r(S_k, A_k) \mu_h(s) \pi^\theta(a|S_h) A_h^{(\pi^\theta, (\tilde{\pi})_{(h+1)})}(S_h, a) \\
& \quad \left. + \sum_{s \in \mathcal{S}_h} \sum_{a \in \mathcal{A}_s} \mu(s)^2 \pi^\theta(a|s)^2 A_h^{(\pi^\theta, (\tilde{\pi})_{(h+1)})}(s, a)^2 \right].
\end{aligned}$$

732 We consider all three terms separately. For the first term we have

$$\begin{aligned}
& \mathbb{E}_{\mu_h}^{(\pi^\theta, (\tilde{\pi})_{(h+1)})} \left[ \sum_{a \in \mathcal{A}_s} (\mathbf{1}_{a=A_h} - \pi^\theta(a|S_h))^2 \left( \sum_{k=h}^{H-1} r(S_k, A_k) \right)^2 \right] \\
& = \mathbb{E}_{\mu_h}^{(\pi^\theta, (\tilde{\pi})_{(h+1)})} \left[ \left( \sum_{k=h}^{H-1} r(S_k, A_k) \right)^2 \right] - 2 \mathbb{E}_{\mu_h}^{(\pi^\theta, (\tilde{\pi})_{(h+1)})} \left[ \pi^\theta(A_h|S_h) \left( \sum_{k=h}^{H-1} r(S_k, A_k) \right)^2 \right] \\
& \quad + \mathbb{E}_{\mu_h}^{(\pi^\theta, (\tilde{\pi})_{(h+1)})} \left[ \sum_{a \in \mathcal{A}_s} \pi^\theta(a|S_h)^2 \left( \sum_{k=h}^{H-1} r(S_k, A_k) \right)^2 \right] \\
& \leq ((H-h)R^*)^2 - 0 + ((H-h)R^*)^2 \\
& = 2((H-h)R^*)^2,
\end{aligned}$$

733 by bounded reward assumption and the fact that  $\pi^\theta$  is a probability distribution. For the second

734 term, we note that  $A_h^{(\pi^\theta, (\tilde{\pi})_{(h+1)})}(S_h, a)$  can be negative, therefore we consider the absolute value  
735 and obtain

$$\begin{aligned}
& 2 \mathbb{E}_{\mu_h}^{(\pi^\theta, (\tilde{\pi})_{(h+1)})} \left[ \sum_{a \in \mathcal{A}_s} (\mathbf{1}_{a=A_h} - \pi^\theta(a|S_h)) \sum_{k=h}^{H-1} r(S_k, A_k) \mu_h(s) \pi^\theta(a|S_h) |A_h^{(\pi^\theta, (\tilde{\pi})_{(h+1)})}(S_h, a)| \right] \\
& \leq 2 \mathbb{E}_{\mu_h}^{(\pi^\theta, (\tilde{\pi})_{(h+1)})} \left[ \sum_{a \in \mathcal{A}_s} 1 \cdot (H-h)R^* \cdot 1 \cdot \pi^\theta(a|S_h) \cdot (H-h)R^* \right] \\
& = 2((H-h)R^*)^2.
\end{aligned}$$

736 For the last term we have

$$\mathbb{E}_{\mu}^{\pi_t} \left[ \sum_{s \in \mathcal{S}_h} \sum_{a \in \mathcal{A}_s} \mu(s)^2 \pi_t^\theta(a|s)^2 A_t^{\pi_t}(s, a)^2 \right] \leq ((H-h)R^*)^2.$$

737 In total, it holds that

$$\mathbb{E}_{\mu_h}^{(\pi^\theta, (\tilde{\pi})_{(h+1)})} \left[ \|\widehat{\nabla} J_h^{K_h}(\theta) - \nabla J_h(\theta)\|^2 \right] \leq \frac{5((H-h)R^*)^2}{K_h}.$$

738

□

739 **C.1 Proofs of Section 4.1**

740 We state the stochastic approximation theorem in Bertsekas and Tsitsiklis (2000) to prove convergence  
741 of stochastic softmax policy gradient to a stationary point.

742 **Proposition C.2** (Bertsekas and Tsitsiklis (2000), Proposition 3). *Let  $F : \mathbb{R}^d \rightarrow \mathbb{R}$  be an  $L$ -smooth  
743 function, i.e.*

$$\|\nabla F(x) - \nabla F(y)\| \leq L\|x - y\|.$$

744 Consider  $(X_n)$  a sequence generated by

$$X_{n+1} = X_n + \gamma_n(S_n + W_n),$$

745 where  $(\gamma_n)$  is deterministic positive step size,  $S_n$  a descent direction, and  $W_n$  is a random noise term.  
746 Let  $(\mathcal{F}_n)$  be an increasing sequence of  $\sigma$ -fields. We assume the following:

747 (i)  $\sum_{n \geq 1} \gamma_n = \infty$ , and  $\sum_{n \geq 1} \gamma_n^2 < \infty$ .

748 (ii)  $(X_n)_{n \geq 0}$  and  $(W_n)_{n \geq 0}$  are  $(\mathcal{F}_n)$ -measurable.

749 (iii) There exists positive constants  $C_1$  and  $C_2$  such that for all  $n \geq 1$

$$C_1 \|\nabla F(X_n)\|^2 \leq -\nabla F(X_n)^T S_n \quad \text{and} \quad \|S_n\| \leq C_2(1 + \|\nabla F(X_n)\|^2),$$

750 (iv) There exists a positive deterministic constant  $C$  such that for all  $n \geq 1$ ,

$$\mathbb{E}[W_n | \mathcal{F}_n] = 0 \quad \text{and} \quad \mathbb{E}[\|W_n\|^2 | \mathcal{F}_n] \leq C(1 + \|\nabla F(X_n)\|^2).$$

751 Then either  $F(X_n) \rightarrow \infty$  for  $t \rightarrow \infty$  or  $F(X_n)$  converges to a finite function such that  
752  $\lim_{n \rightarrow \infty} \nabla F(X_n) = 0$  almost-surely.

753 **Theorem 4.1.** For any  $h \in \mathcal{H}$  consider the stochastic process  $(\theta_n)_{n \geq 0}$  generated by

$$\theta_{n+1} = \theta_n + \eta_h^{(n)} \widehat{\nabla} J_h^{K_h}(\theta),$$

754 for arbitrary batch size  $K_h \geq 1$  and initial  $\theta_0$  such that  $\mathbb{E}[J_h(\theta_0)] < \infty$ . Furthermore, suppose that  
755  $\eta_h^{(n)}$  is decreasing, such that  $\sum_{n \geq 0} \eta_h^{(n)} = \infty$  and  $\sum_{n \geq 0} (\eta_h^{(n)})^2 < \infty$ . Then  $\nabla J_h(\theta_n) \rightarrow 0$  almost  
756 surely for  $n \rightarrow \infty$ .

757 *Proof.* We apply Proposition C.2 as follows:

758 The function  $F$  is the negative objective function with respect to parameter  $\theta$ , i.e.

$$F : \mathbb{R}^{d_h} \rightarrow \mathbb{R}, \quad \theta \mapsto -J_h(\theta).$$

759 Further, let

- 760 •  $X_n \equiv \theta_n$ ,
- 761 •  $S_n \equiv -\nabla F(\theta_n) = \nabla J_h(\theta_n)$ ,
- 762 •  $W_n \equiv \widehat{\nabla} J_h^{K_h}(\theta_n) - \nabla J_h(\theta_n)$  and
- 763 •  $\gamma_n \equiv \eta_h^{(n)}$ .

764 Then,

$$\theta_{n+1} = \theta_n + \eta_h^{(n)} \widehat{\nabla} J_h^{K_h}(\theta_n) = X_n + \gamma_n(S_n + W_n).$$

765 Denote by  $(\mathcal{F}_n)_{n \geq 0}$  the natural filtration of the stochastic process  $(\theta_n)_{n \geq 0}$ . Then,  $X_n$  and  $W_n$  are  
766  $\mathcal{F}_n$ -measurable and Condition (iii) is obviously satisfied using  $C_1 = C_2 = 1$ . By Lemma C.1 we  
767 have that

$$\mathbb{E}[\widehat{\nabla} J_h^{K_h}(\theta_n) | \mathcal{F}_n] = \nabla J_h(\theta_n)$$

768 and

$$\mathbb{E}[\|\widehat{\nabla} J_h^{K_h}(\theta_n) - \nabla J_h(\theta_n)\|^2 | \mathcal{F}_n] \leq \frac{C_h}{K_h}.$$

769 Thus, Condition (iv) is satisfied. Given the fact that the value function is bounded by the bounded  
770 reward assumption we conclude

$$\nabla J_h(\theta_n) \rightarrow 0 \quad \text{for } n \rightarrow \infty.$$

771

□

772 **C.2 Proofs of Section 4.2**

773 **Lemma C.3.** *The softmax policy  $\pi^\theta(a|s)$  is  $\sqrt{2}$ -Lipschitz with respect to  $\theta \in \mathbb{R}^d$  for every  $s, a$ .*

774 *Proof.* The derivative of the softmax function is

$$\begin{aligned} \frac{\partial \pi^\theta(a|s)}{\partial \theta(s', a')} &= \mathbf{1}_{s'=s} \left[ \frac{\mathbf{1}_{a'=a} \exp(\theta(s, a)) \left( \sum_{\tilde{a} \in \mathcal{A}_s} \exp(\theta(s, \tilde{a})) \right) - \exp(\theta(s, a)) \exp(\theta(s, a'))}{\left( \sum_{\tilde{a} \in \mathcal{A}_s} \exp(\theta(s, \tilde{a})) \right)^2} \right] \\ &= \mathbf{1}_{s'=s} \left[ \mathbf{1}_{a'=a} \pi^\theta(a|s) - \pi^\theta(a|s) \pi^\theta(a'|s) \right]. \end{aligned}$$

775 Therefore,

$$\begin{aligned} \|\nabla \pi^\theta(a|s)\|_2 &= \sqrt{\sum_{\tilde{a} \in \mathcal{A}_s} \left( \mathbf{1}_{a'=\tilde{a}} \pi^\theta(a|s) - \pi^\theta(a|s) \pi^\theta(a'|s) \right)^2} \\ &\leq \sqrt{\pi^\theta(a|s)^2 - 2\pi^\theta(a|s)^3 + \sum_{\tilde{a} \in \mathcal{A}_s} \pi^\theta(a'|s)^2 \pi^\theta(a|s)^2} \\ &\leq \sqrt{2}. \end{aligned}$$

776

□

777 **Lemma C.4.** *It holds almost surely that  $\min_{0 \leq n \leq \tau} \min_{s \in \mathcal{S}_h} \pi^{\theta_n}(a^*(s)|s) \geq \frac{c_h}{2}$  is strictly positive.*

778 *Proof.* For every  $n \leq \tau$  we obtain by the  $\sqrt{2}$ -Lipschitz continuity in Lemma C.3 that

$$\begin{aligned} \pi^{\theta_n}(a^*(s)|s) &\geq \pi^{\bar{\theta}_n}(a^*(s)|s) - |\pi^{\bar{\theta}_n}(a^*(s)|s) - \pi^{\theta_n}(a^*(s)|s)| \\ &\geq \pi^{\bar{\theta}_n}(a^*(s)|s) - \sqrt{2} \|\theta_t - \bar{\theta}_n\|_2 \\ &> \frac{c_h}{2} > 0, \end{aligned}$$

779 holds almost surely. The claim follows directly. □

780 **Lemma 4.2.** *Suppose  $\mu_h(s) > 0$  for all  $s \in \mathcal{S}_h$ , the batch size  $K_h^{(n)} \geq \frac{9c_h^2 C_h}{32\beta_h^2 N_h^{\frac{3}{2}}} \left(1 - \frac{1}{2\sqrt{N_h}}\right) n^2$  is*

781 *increasing for some  $N_h \geq 1$  and the step size  $\eta_h = \frac{1}{\beta_h \sqrt{N_h}}$ , for fixed  $h \in \mathcal{H}$ . Then,*

$$\mathbb{E}[(J_h^* - J_h(\theta_n)) \mathbf{1}_{\{n \leq \tau\}}] \leq \frac{16\sqrt{N_h} \beta_h}{3 \left(1 - \frac{1}{2\sqrt{N_h}}\right) c_h^2 n}.$$

782 *Proof.* Fix  $h \in \mathcal{H}$ . Let  $(\mathcal{F}_n)_{n \geq 0}$  be the natural filtration of  $(\theta)_{n \geq 0}$ . Exactly as in the proof of

783 Theorem 3.8 we deduce from the  $\beta_h$ -smoothness of  $J_h$  that

$$J_h(\theta_{n+1}) \geq J_h(\theta_n) + (\nabla J_h(\theta_n))^T (\theta_{n+1} - \theta_n) - \frac{\beta_h}{2} \|\theta_{n+1} - \theta_n\|^2, \quad \text{a.s.}$$

784 We continue with

$$\begin{aligned} J_h(\theta_{n+1}) &\geq J_h(\theta_n) + \eta_h (\nabla J_h(\theta_n))^T \widehat{\nabla} J_h^{K_h}(\theta_n) - \frac{\beta_h \eta_h^2}{2} \|\widehat{\nabla} J_h^{K_h}(\theta_n)\|^2 \\ &= J_h(\theta_n) + \eta_h (\nabla J_h(\theta_n))^T \nabla J_h(\theta_n) + \eta_h (\nabla J_h(\theta_n))^T (\widehat{\nabla} J_h^{K_h}(\theta_n) - \nabla J_h(\theta_n)) \\ &\quad - \frac{\beta_h \eta_h^2}{2} \|\widehat{\nabla} J_h^{K_h}(\theta_n) - \nabla J_h(\theta_n)\|^2. \end{aligned}$$

785 We denote  $\xi_n := \widehat{\nabla} J_h^{K_h}(\theta_n) - \nabla J_h(\theta_n)$  and rewrite the above inequality

$$\begin{aligned} J_h(\theta_{n+1}) &\geq J_h(\theta_n) + \eta_h \|\nabla J_h(\theta_n)\|^2 + \eta_h \langle \nabla J_h(\theta_n), \xi_n \rangle \\ &\quad - \frac{\beta_h \eta_h^2}{2} (\|\xi_n\|^2 + 2\langle \xi_n, \nabla J_h(\theta_n) \rangle + \|\nabla J_h(\theta_n)\|^2) \\ &= J_h(\theta_n) + \left(\eta_h - \frac{\beta_h \eta_h^2}{2}\right) \|\nabla J_h(\theta_n)\|^2 + \left(\eta_h - \beta_h \eta_h^2\right) \langle \nabla J_h(\theta_n), \xi_n \rangle - \frac{\beta_h \eta_h^2}{2} \|\xi_n\|^2. \end{aligned}$$

786 Next, we take the conditional expectation on  $\mathcal{F}_n$ . Then with Lemma C.1, we obtain

$$\begin{aligned}\mathbb{E}\left[J(\theta_{n+1})|\mathcal{F}_n\right] &\geq J(\theta_n) + \left(\eta_h - \frac{\beta_h\eta_h^2}{2}\right)\|\nabla J_h(\theta_n)\|^2 + \left(\eta_h - \beta_h\eta_h^2\right)\langle\nabla J(\theta_n), \mathbb{E}[\xi_n|\mathcal{F}_n]\rangle \\ &\quad - \frac{\beta_h\eta_h^2}{2}\mathbb{E}[\|\xi_n\|^2|\mathcal{F}_n] \\ &\geq J(\theta_n) + \left(\eta_h - \frac{\beta_h\eta_h^2}{2}\right)\|\nabla J(\theta_n)\|^2 - \frac{\beta_h\eta_h^2 C_h}{2K_h^{(n)}}.\end{aligned}$$

787 We take the expectation of this inequality on both sides under the event  $\{n+1 \leq \tau\}$ . Note that  
788  $\{n+1 \leq \tau\} = \{\tau \leq n\}^C$  is  $\mathcal{F}_n$ -measurable and that  $\mathbf{1}_{\{n+1 \leq \tau\}} \leq \mathbf{1}_{\{n \leq \tau\}}$  a.s., thus

$$\begin{aligned}&\mathbb{E}\left[(J_h^* - J_h(\theta_{n+1}))\mathbf{1}_{\{n+1 \leq \tau\}}\right] \\ &= \mathbb{E}\left[\mathbb{E}\left[(J_h^* - J_h(\theta_{n+1}))|\mathcal{F}_n\right]\mathbf{1}_{\{n+1 \leq \tau\}}\right] \\ &\leq \mathbb{E}\left[\left(J_h^* - \mathbb{E}\left[J_h(\theta_{n+1})|\mathcal{F}_n\right]\right)\mathbf{1}_{\{n \leq \tau\}}\right] \\ &\leq \mathbb{E}\left[(J_h^* - J_h(\theta_n))\mathbf{1}_{\{n \leq \tau\}}\right] - \left(\eta_h - \frac{\beta_h\eta_h^2}{2}\right)\mathbb{E}\left[\|\nabla J_h(\theta_n)\|^2\mathbf{1}_{\{n \leq \tau\}}\right] + \frac{\beta_h\eta_h^2 C_h}{2K_h^{(n)}}.\end{aligned}$$

789 By Lemma 3.6 we have that  $\|\nabla J_h(\theta_n)\|^2 \geq \min_{s \in \mathcal{S}} \pi^{\theta_n}(a^*(s|s))^2 (J_h^* - J_h(\theta_n))^2$  almost surely, and  
790 by Lemma C.4 we have that  $\min_{0 \leq n \leq \tau} \min_{s \in \mathcal{S}} \pi^{\theta_n}(a^*(s|s))^2 \geq \frac{c_h}{2} > 0$  almost surely. Therefore,

$$\begin{aligned}&\mathbb{E}\left[(J_h^* - J_h(\theta_{n+1}))\mathbf{1}_{\{n+1 \leq \tau\}}\right] \\ &\leq \mathbb{E}\left[(J_h^* - J_h(\theta_n))\mathbf{1}_{\{n \leq \tau\}}\right] - \left(\eta_h - \frac{\beta_h\eta_h^2}{2}\right)\mathbb{E}\left[\min_{s \in \mathcal{S}} \pi^{\theta_n}(a^*(s|s))^2 (J_h^* - J_h(\theta_n))^2 \mathbf{1}_{\{n \leq \tau\}}\right] \\ &\quad + \frac{\beta_h\eta_h^2 C_h}{2K_h^{(n)}}, \\ &\leq \mathbb{E}\left[(J_h^* - J_h(\theta_n))\mathbf{1}_{\{n \leq \tau\}}\right] - \left(\eta_h - \frac{\beta_h\eta_h^2}{2}\right)\frac{c_h^2}{4}\mathbb{E}\left[(J_h^* - J_h(\theta_n))\mathbf{1}_{\{n \leq \tau\}}\right]^2 + \frac{\beta_h\eta_h^2 C_h}{2K_h^{(n)}},\end{aligned}$$

791 where we used Jensen's inequality in the last step.

792 For  $d_n := \mathbb{E}\left[(J_h^* - J_h(\theta_n))\mathbf{1}_{\{n \leq \tau\}}\right]$  we imply the recursive inequality

$$d_{n+1} \leq d_n - \left(\eta_h - \frac{\beta_h\eta_h^2}{2}\right)\frac{c_h^2}{4}d_n^2 + \frac{\beta_h\eta_h^2 C_h}{2K_h^{(n)}}.$$

793 Define  $w := \left(\eta_h - \frac{\beta_h\eta_h^2}{2}\right)\frac{c_h^2}{4} > 0$  and  $B = \frac{\beta_h\eta_h^2 C_h}{2} > 0$ , then

$$d_{n+1} \leq d_n(1 - wd_n) + \frac{B}{K_h^{(n)}}$$

794 and by our choice of  $\eta_h$ ,

$$K_h^{(n)} \geq \frac{9c_h^2 C_h}{32\beta_h^2 N_h^{\frac{3}{2}}}\left(1 - \frac{1}{2\sqrt{N_h}}\right)n^2 = \frac{9}{4}wBn^2,$$

795 Moreover, we have

$$\frac{4}{3w} = \frac{16\sqrt{N_h}\beta_h}{3\left(1 - \frac{1}{2\sqrt{N_h}}\right)c_h^2}.$$

796 For  $\beta_h = 2(H-h)R^*|\mathcal{A}|$ , it holds that

$$d_1 \leq (H-h)R^* \leq \beta_h \leq \frac{4}{3w} \leq \frac{4}{3w \cdot 1},$$

797 because  $c_h \leq 1$  and  $\frac{1}{\sqrt{N_h}}(1 - \frac{1}{2\sqrt{N_h}}) < 1$  for all  $N_h \geq 1$ . Suppose the induction assumption  
 798  $d_n \leq \frac{4}{3wn}$  holds true, then for  $d_{n+1}$ ,

$$d_{n+1} \leq d_n - wd_n^2 + \frac{B}{K_h^{(n)}}.$$

799 The function  $f(x) = x - wx^2$  is monotonically increasing in  $[0, \frac{1}{2w}]$  and by induction assumption  
 800  $d_n \leq \frac{1}{4wn} \leq \frac{1}{2w}$ . So  $d_n - wd_n^2 \leq \frac{4}{3wn}$  which implies

$$\begin{aligned} d_{n+1} &\leq d_n - wd_n^2 + \frac{B}{K_h^{(n)}} \\ &\leq \frac{4}{3wn} - \frac{16}{9wn^2} + \frac{B}{K_n} \\ &\leq \frac{4}{3wn} - \frac{16}{9wn^2} + \frac{4B}{9wBn^2} \\ &= \frac{4}{3wn} - \frac{12}{9wn^2} \\ &= \frac{4}{3w} \left( \frac{1}{n} - \frac{1}{n^2} \right) \\ &\leq \frac{4}{3w(n+1)}, \end{aligned}$$

801 where we used that  $K_h^{(n)} \geq \frac{9}{4}wBn^2$ . We follow the claim

$$d_n \leq \frac{4}{3wn} = \frac{16\sqrt{N_h}\beta}{3(1 - \frac{1}{2\sqrt{N_h}})c_h^2 n}.$$

802

□

803 **Lemma 4.3.** Suppose  $\mu_h(s) > 0$  for all  $s \in \mathcal{S}_h$ . Then, for any  $\delta > 0$ , we have  $\mathbb{P}(\tau \leq n) < \delta$  if  
 804  $K_h \geq \frac{16n^3 C_h}{\beta^2 c_h^2 \delta^2}$  and  $\eta_h = \frac{1}{\sqrt{n}\beta_h}$ .

805 *Proof.* By the definition of  $\tau$  we have

$$\mathbb{P}(\tau \leq n) = \mathbb{P}(\max_{0 \leq t \leq n} \|\theta_t - \bar{\theta}_t\| \geq \frac{c_h}{4}),$$

806 so we first study  $\|\theta_t - \bar{\theta}_t\|$ . We emphasize that Ding et al. (2022, Lemma 6.3) established a similar  
 807 recursive inequality.

$$\begin{aligned} \|\theta_t - \bar{\theta}_t\| &= \|\theta_0 + \sum_{k=1}^{t-1} \eta_h \widehat{\nabla} J_h^{K_h}(\theta_k) - (\theta_0 + \sum_{k=1}^{t-1} \eta_h \nabla J_h(\bar{\theta}_k))\| \\ &\leq \sum_{k=1}^{t-1} \eta_h \|\widehat{\nabla} J_h^{K_h}(\theta_k) - \nabla J_h(\bar{\theta}_k)\| \\ &\leq \eta_h \sum_{k=1}^{t-1} (\|\widehat{\nabla} J_h^{K_h}(\theta_k) - \nabla J_h(\theta_k)\| + \|\nabla J_h(\theta_k) - \nabla J_h(\bar{\theta}_k)\|). \end{aligned}$$

808 We define again  $\xi_k = \widehat{\nabla} J_h^{K_h}(\theta_k) - \nabla J_h(\theta_k)$  and continue

$$\begin{aligned} \|\theta_t - \bar{\theta}_t\| &\leq \eta_h \sum_{k=1}^{t-1} (\|\xi_k\| + \beta_h \|\theta_k - \bar{\theta}_k\|) \\ &= \eta_h \sum_{k=1}^{t-1} \|\xi_k\| + \eta_h \beta_h \sum_{k=1}^{t-1} \|\theta_k - \bar{\theta}_k\|. \end{aligned}$$

809 Using this inequality sequentially leads to

$$\begin{aligned}
\|\theta_t - \bar{\theta}_t\| &\leq \eta_h \sum_{k=1}^{t-1} \|\xi_k\| + \eta_h \beta_h \sum_{k=1}^{t-1} \|\theta_k - \bar{\theta}_k\| \\
&\leq \eta_h \sum_{k=1}^{t-1} \|\xi_k\| + \eta_h \beta_h \sum_{k=1}^{t-2} \|\theta_k - \bar{\theta}_k\| + \eta_h \beta_h \left( \eta_h \sum_{k=1}^{t-2} \|\xi_k\| + \eta_h \beta_h \sum_{k=1}^{t-2} \|\theta_k - \bar{\theta}_k\| \right) \\
&= \eta_h \sum_{k=1}^{t-1} \|\xi_k\| + \eta_h^2 \beta_h \sum_{k=1}^{t-2} \|\xi_k\| + (1 + \eta_h \beta_h) \eta_h \beta_h \sum_{k=1}^{t-2} \|\theta_k - \bar{\theta}_k\| \\
&= \eta_h \|\xi_{t-1}\| + \eta_h (1 + \eta_h \beta_h) \sum_{k=1}^{t-2} \|\xi_k\| + (1 + \eta_h \beta_h) \eta_h \beta_h \sum_{k=1}^{t-2} \|\theta_k - \bar{\theta}_k\| \\
&\leq \sum_{k=1}^{t-1} \eta_h (1 + \eta_h \beta_h)^{t-k-1} \|\xi_k\|.
\end{aligned}$$

810 Applying Markov's inequality results in

$$\begin{aligned}
\mathbb{P}(\tau \leq n) &= \mathbb{P}\left(\max_{0 \leq t \leq n} \|\theta_t - \bar{\theta}_t\| \geq \frac{c_h}{4}\right) \\
&\leq \mathbb{P}\left(\sum_{k=1}^{n-1} \eta_h (1 + \eta_h \beta_h)^{n-k-1} \|\xi_k\| \geq \frac{c_h}{4}\right) \\
&\leq \frac{4 \sum_{k=1}^{n-1} \eta_h (1 + \eta_h \beta_h)^{n-k-1} \mathbb{E}[\|\xi_k\|]}{c_h} \\
&\leq \frac{4n\eta_h (1 + \eta_h \beta_h)^{n-1} \sqrt{\frac{C_h}{K_h}}}{c_h},
\end{aligned}$$

811 where in the last inequality  $\mathbb{E}[\|\xi_k\|] \leq \sqrt{\mathbb{E}[\|\xi_k\|^2]} \leq \sqrt{\frac{C_h}{K_h}}$  by Jensen's inequality and Lemma C.1.

812 Now we plug in the choice of  $\eta_h = \frac{1}{\sqrt{n}\beta_h}$ ,

$$\begin{aligned}
\mathbb{P}(\tau \leq n) &\leq \frac{4n \frac{1}{\sqrt{n}\beta_h} (1 + \frac{1}{\sqrt{n}\beta_h} \beta_h)^{n-1} \sqrt{\frac{C_h}{K_h}}}{c_h} \\
&= \frac{4\sqrt{n} (1 + \frac{1}{\sqrt{n}})^{n-1} \sqrt{C_h}}{\beta_h c_h \sqrt{K_h}} \\
&\leq \frac{4\sqrt{nn} \sqrt{C_h}}{\beta_h c_h \sqrt{K_h}},
\end{aligned}$$

813 where the last step is due to  $f(x) = (1 + \frac{1}{\sqrt{x}})^{x-1} \leq x$  for all  $x \geq 1$ . We follow that  $\mathbb{P}(\tau < n) < \delta$  if

$$K_h \geq \frac{16n^3 C_h}{\beta_h^2 c_h^2 \delta^2}.$$

814

□

815 **Theorem 4.4.** Suppose the stochastic policy gradient updates are generated by (9) for arbitrary  
816 initialization  $\theta_0 \in \mathbb{R}^{d_h}$ . Suppose that  $\mu_h(s) > 0$  for all  $s \in \mathcal{S}_h$  and choose for any  $\delta, \epsilon > 0$ ,

817 (i) the number of training steps  $N_h \geq \left(\frac{64\beta_h}{3\delta c_h^2 \epsilon}\right)^2$ ,

818 (ii) the step size  $\eta_h = \frac{1}{\beta_h \sqrt{N_h}}$  and the batch size  $K_h = \frac{64N_h^3 C_h}{\beta_h^2 c_h^2 \delta^2}$ .

819 Then,  $\mathbb{P}((J_h^* - J_h(\theta_{N_h})) \geq \epsilon) \leq \delta$ .

820 *Proof.* We separate the probability using the stopping time  $\tau$  and obtain

$$\begin{aligned}
\mathbb{P}((J_h^* - J_h(\theta_{N_h})) \geq \epsilon) &\leq \mathbb{P}(\{\tau \geq N_h\} \cap \{(J_h^* - J_h(\theta_{N_h})) \geq \epsilon\}) \\
&\quad + \mathbb{P}(\{\tau \leq N_h\} \cap \{(J_h^* - J_h(\theta_{N_h})) \geq \epsilon\}) \\
&\leq \frac{\mathbb{E}[(J_h^* - J_h(\theta_{N_h})) \mathbf{1}_{\{\tau \geq N_h\}}]}{\epsilon} + \mathbb{P}(\tau \leq N_h) \\
&\leq \frac{1}{\epsilon} \frac{16\beta_h \sqrt{N_h}}{3(1 - \frac{1}{2\sqrt{N_h}})c_h^2 N_h} + \frac{\delta}{2} \\
&\leq \frac{\delta}{2} + \frac{\delta}{2} \\
&= \delta,
\end{aligned}$$

821 where the second inequality it due to Lemma 4.2 and Lemma 4.3. The last inequality follows by our  
822 choice of  $N_h$ :

$$\frac{16\beta_h}{3\epsilon(1 - \frac{1}{2\sqrt{N_h}})c_h^2 \sqrt{N_h}} \leq \frac{\delta}{2}$$

823 for  $N_h \geq (\frac{32\beta_h}{3\epsilon\delta c_h^2} + \frac{1}{2})^2$ , which is satisfied for  $N_h \geq (\frac{64\beta_h}{3\epsilon\delta c_h^2})^2$ . Note further that we could use  
824 Lemma 4.2 in the equation above with a constant batch size  $K_h$ , because

$$\max \left\{ \frac{9c_h^2 C_h}{32\beta_h^2 N_h^{\frac{3}{2}}} (1 - \frac{1}{2\sqrt{N_h}})n^2, \frac{16N_h^3 C_h}{\beta^2 c_h^2 \delta^2} \right\} = \frac{16N_h^3 C_h}{\beta^2 c_h^2 \delta^2},$$

825 for all  $n \leq N_h$ , as  $(1 - \frac{1}{2\sqrt{N_h}}) < 1$ ,  $c_h < 1$  and  $\frac{C_h}{\beta^2} < 1$ . □

## 826 D Proofs of Section 5

827 **Theorem 5.1.** Assume that  $\mu_h(s) > 0$  for all  $h \in \mathcal{H}$ ,  $s \in \mathcal{S}_h$ . Let  $\epsilon > 0$ , the step size  $\eta_h = \frac{1}{\beta_h}$  and  
828 the batch size  $N_h = \frac{4(H-h)HR^*|\mathcal{A}|}{c_h^2 \epsilon} \|\frac{1}{\mu_h}\|_\infty$ . Denote by  $\hat{\pi}^* = (\pi^{\theta_0^{N_0}}, \dots, \pi^{\theta_{H-1}^{N_{H-1}}})$  the final policy  
829 from Algorithm 1, then for all  $s \in \mathcal{S}_0$ ,

$$V_0^*(s) - V_0^{\hat{\pi}^*}(s) \leq \epsilon.$$

830 *Proof.* First note that by our choice of the future policy  $\tilde{\pi} = \hat{\pi}^*$  we have

$$J_{h,s}(\theta_h^{(N_h)}) = V_h^{\hat{\pi}^*}(s). \tag{21}$$

831 By Theorem 3.8 we obtain

$$J_h^* - J_h(\theta_h^{(N_h)}) \leq \frac{4(H-h)R^*|\mathcal{A}|}{c_h^2 N_h}.$$

832 For every  $s \in \mathcal{S}_h$ , denote by  $\delta_s$  the dirac measure on state  $s$ , then

$$\begin{aligned}
J_{h,s}^* - J_{h,s}(\theta_h^{(N_h)}) &= \sum_{s' \in \mathcal{S}_h} \mu_h(s') \frac{\delta_s(s')}{\mu_h(s')} J_{h,s}^* - J_{h,s}(\theta_h^{(N_h)}) \\
&\leq \left\| \frac{1}{\mu_h} \right\|_\infty (J_h^* - J_h(\theta_h^{(N_h)})) \\
&\leq \frac{4(H-h)R^*|\mathcal{A}|}{c_h^2 N_h} \left\| \frac{1}{\mu_h} \right\|_\infty,
\end{aligned} \tag{22}$$

833 where  $\left\| \frac{1}{\mu_h} \right\|_{\infty} = \max_{s \in \mathcal{S}_h} \frac{1}{\mu_h(s)} > 0$  by assumption. As  $N_h = \frac{4(H-h)HR^*|\mathcal{A}|}{c_h^2 \epsilon} \left\| \frac{1}{\mu_h} \right\|_{\infty}$ , it holds that

$$J_{h,s}^* - J_{h,s}(\theta_h^{(N_h)}) \leq \frac{\epsilon}{H} \quad (23)$$

834 for every  $s \in \mathcal{S}_h$ . For  $h = H - 1$  it follows directly by (21) and the specialty of the last time point  
835 that for all  $s \in \mathcal{S}_{H-1}$ ,

$$V_{H-1}^*(s) - V_{H-1}^{\hat{\pi}^*}(s) = J_{H-1,s}^* - J_{h,s}(\theta_h^{(N_h)}) \leq \frac{\epsilon}{H}.$$

836 Assume now that for all  $s \in \mathcal{S}_h$ ,

$$V_h^*(s) - V_h^{\hat{\pi}^*}(s) \leq \frac{\epsilon(H-h)}{H}. \quad (24)$$

837 Then it holds for all  $s \in \mathcal{S}_{h-1}$  that,

$$\begin{aligned} J_{h-1,s}^* &= \max_{a \in \mathcal{A}_s} \left( r(s, a) + \sum_{s' \in \mathcal{S}_h} p(s'|s, a) V_h^*(s) - \sum_{s' \in \mathcal{S}_h} p(s'|s, a) (V_h^*(s) - V_h^{\hat{\pi}^*}(s)) \right) \\ &\geq \max_{a \in \mathcal{A}_s} \left( r(s, a) + \sum_{s' \in \mathcal{S}_h} p(s'|s, a) V_h^*(s) \right) - \frac{\epsilon(H-h)}{H} \\ &= V_{h-1}^*(s) - \frac{\epsilon(H-h)}{H}, \end{aligned} \quad (25)$$

838 by the Bellman expectation equation for finite-time MDPs (Puterman (2005)). We close the backward  
839 induction using (21) such that for all  $s \in \mathcal{S}_{h-1}$ ,

$$\begin{aligned} V_{h-1}^*(s) - V_{h-1}^{\hat{\pi}^*}(s) &= V_{h-1}^*(s) - J_{h-1,s}^* + J_{h-1,s}^* - V_{h-1}^{\hat{\pi}^*}(s) \\ &\leq \frac{\epsilon(H-h)}{H} + \frac{\epsilon}{H} \\ &= \frac{\epsilon(H-(h-1))}{H}. \end{aligned} \quad (26)$$

840 Finally, it holds for  $h = 0$  and all  $s \in \mathcal{S}_0$  that

$$V_0^*(s) - V_0^{\hat{\pi}^*}(s) \leq \epsilon.$$

841

□

842 **Theorem 5.2.** Assume that  $\mu_h(s) > 0$  for all  $h \in \mathcal{H}$ ,  $s \in \mathcal{S}_h$ . Let  $\delta, \epsilon > 0$ , the step size  $\eta_h = \frac{1}{\beta_h N_h}$ ,

843 number of training steps  $N_h = \left( \frac{64\beta_h H^2 \left\| \frac{1}{\mu_h} \right\|_{\infty}}{3\delta c_h^2 \epsilon} \right)^2$  and the batch size  $K_h = \frac{64N_h^2 H^2 C_h}{\beta_h c_h^2 \delta^2}$ . Denote by

844  $\hat{\pi}^* = (\pi^{\theta_0^{N_0}}, \dots, \pi^{\theta_{H-1}^{N_{H-1}}})$  the final policy from Algorithm 2, then

$$\mathbb{P} \left( \exists s \in \mathcal{S}_0 : V_0^*(s) - V_0^{\hat{\pi}^*}(s) \geq \epsilon \right) \leq \delta.$$

845 *Proof.* As in the exact gradient case (21) we have by our choice of the future policy  $\tilde{\pi} = \hat{\pi}^*$  that

$$J_{h,s}(\theta_h^{(N_h)}) = V_h^{\hat{\pi}^*}(s). \quad (27)$$

846 By Theorem 4.4 we have that

$$\mathbb{P} \left( J_h^* - J_h(\theta_h^{(N_h)}) \geq \frac{\epsilon}{H \left\| \frac{1}{\mu_h} \right\|_{\infty}} \right) \leq \frac{\delta}{H},$$

847 by our choice of  $N_h$ ,  $\eta_h$  and  $K_h$ .

848 For every  $s \in \mathcal{S}_h$ , denote by  $\delta_s$  the dirac measure on state  $s$ , then as in (22)

$$J_{h,s}^* - J_{h,s}(\theta_h^{(N_h)}) \leq \left\| \frac{1}{\mu_h} \right\|_{\infty} (J_h^* - J_h(\theta_h^{(N_h)})) \quad \text{a.s.}$$



849 Thus, for all  $h \in \mathcal{H}$  it holds that

$$\mathbb{P}\left(\exists s \in \mathcal{S}_h : J_{h,s}^* - J_{h,s}(\theta_h^{(N_h)}) \geq \frac{\epsilon}{H}\right) \leq \mathbb{P}\left(J_h^* - J_h(\theta_h^{(N_h)}) \geq \frac{\epsilon}{H \left\| \frac{1}{\mu_h} \right\|_\infty}\right) \leq \frac{\delta}{H}. \quad (28)$$

850 Define the event  $A_h := \{J_{h,s}^* - J_{h,s}(\theta_h^{(N_h)}) < \frac{\epsilon}{H}, \forall s \in \mathcal{S}_h\}$ . Then (29) is equivalent to  $\mathbb{P}(A_h^C) \leq \frac{\delta}{H}$ .  
 851 For  $h = H - 1$  it follows directly with (27) and the special property of the last time point that

$$\mathbb{P}\left(\exists s \in \mathcal{S}_h : V_{H-1}^*(s) - V_{H-1}^{\hat{\pi}^*}(s) \geq \frac{\epsilon}{H}\right) = \mathbb{P}\left(\exists s \in \mathcal{S}_h : J_{H-1,s}^* - J_{H-1,s}(\theta_h^{(N_h)}) \geq \frac{\epsilon}{H}\right) \leq \frac{\delta}{H}.$$

852 We close the proof by induction. Assume for some  $0 < h < H$  that

$$\mathbb{P}\left(\exists s \in \mathcal{S}_h : V_h^*(s) - V_h^{\hat{\pi}^*}(s) \geq \frac{\epsilon(H-h)}{H}\right) \leq \frac{\delta(H-h)}{H}. \quad (29)$$

853 Define  $B_h := \{V_h^*(s) - V_h^{\hat{\pi}^*}(s) < \frac{\epsilon(H-h)}{H}, \forall s \in \mathcal{S}_h\}$ . Similar to (25), on the event  $B_h$  it holds that

$$\begin{aligned} J_{h-1,s}^* &= \max_{a \in \mathcal{A}_s} \left( r(s, a) + \sum_{s' \in \mathcal{S}_h} p(s'|s, a) V_h^*(s) - \sum_{s' \in \mathcal{S}_h} p(s'|s, a) (V_h^*(s) - V_h^{\hat{\pi}^*}(s)) \right) \\ &> \max_{a \in \mathcal{A}_s} \left( r(s, a) + \sum_{s' \in \mathcal{S}_h} p(s'|s, a) V_h^*(s) \right) - \frac{\epsilon(H-h)}{H} \\ &= V_{h-1}^*(s) - \frac{\epsilon(H-h)}{H}. \end{aligned}$$

854 We obtain on the event  $A_{h-1} \cap B_h$  that (compare to (26))

$$\begin{aligned} V_{h-1}^*(s) - V_{h-1}^{\hat{\pi}^*}(s) &= V_{h-1}^*(s) - J_{h-1,s}^* + J_{h-1,s}^* - V_{h-1}^{\hat{\pi}^*}(s) \\ &< \frac{\epsilon(H-h)}{H} + \frac{\epsilon}{H} \\ &= \frac{\epsilon(H-(h-1))}{H}, \end{aligned}$$

855 for every  $s \in \mathcal{S}_{h-1}$ . Hence,  $A_{h-1} \cap B_h \subseteq B_{h-1}$ . Finally, we close the induction by

$$\begin{aligned} &\mathbb{P}\left(\exists s \in \mathcal{S}_{h-1} : V_{h-1}^*(s) - V_{h-1}^{\hat{\pi}^*}(s) \geq \frac{\epsilon(H-(h-1))}{H}\right) \\ &= 1 - \mathbb{P}(B_{h-1}) \leq 1 - \mathbb{P}(A_{h-1} \cap B_h) = \mathbb{P}(A_{h-1}^C \cup B_h^C) \leq \mathbb{P}(A_{h-1}^C) + \mathbb{P}(B_h^C) \\ &= \mathbb{P}\left(\exists s \in \mathcal{S}_{h-1} : J_{h-1,s}^* - J_{h-1,s}(\theta_{h-1}^{(N_{h-1})}) \geq \frac{\epsilon}{H}\right) \\ &\quad + \mathbb{P}\left(\exists s \in \mathcal{S}_h : V_h^*(s) - V_h^{\hat{\pi}^*}(s) \geq \frac{\epsilon(H-h)}{H}\right) \\ &\leq \frac{\delta}{H} + \frac{\delta(H-h)}{H} \\ &= \frac{\delta(H-(h-1))}{H}. \end{aligned}$$

856 For  $h = 0$  we have shown the claim

$$\mathbb{P}\left(\exists s \in \mathcal{S}_0 : V_0^*(s) - V_0^{\hat{\pi}^*}(s) \geq \epsilon\right) \leq \delta.$$

857 □

## 858 E Proofs of Section 6

859 We denote by  $\text{GEOM}(p)$  the geometric distribution with parameter  $p \in (0, 1]$ .

860 Algorithm 3 states the construction of an approximate gradient  $\widehat{\nabla} J^K(\theta) \approx \nabla J(\theta)$ . Note that for batch  
 861 size  $K = 1$ ,  $\widehat{\nabla} J^1(\theta)$  is the estimator  $\widehat{\nabla} J(\theta)$  proposed in (Zhang et al., 2020, Eq. (3.6)). Furthermore,  
 862 it is important to highlight that the tabular softmax parametrization meets the assumptions made by  
 863 (Zhang et al., 2020, Ass. 3.1):

---

**Algorithm 3:** Estimate unbiased gradient for  $\nabla J(\theta)$ 

---

**Data:** Let  $\theta \in \Theta$ .

**Result:** Approximate gradient  $\widehat{\nabla} J^K(\theta)$

**for**  $i = 1, \dots, K$  **do**

    Sample  $T \sim \text{GEOM}(1 - \gamma)$

    Sample trajectory  $(s_0^i, a_0^i, \dots, s_T^i, a_T^i)$ , s.t.  $s_0 \sim \mu$ ,  $a_t^i \sim \pi^\theta(\cdot | s_t^i)$ ,  $s_{t+1}^i \sim p(\cdot | s_t^i, a_t^i)$

    Sample  $T' \sim \text{GEOM}(1 - \gamma^{\frac{1}{2}})$

    Set  $\tilde{s}_0^i = s_T^i$ ,  $\tilde{a}_0^i = a_T^i$

    Sample trajectory  $(\tilde{s}_1^i, \tilde{a}_1^i, \dots, \tilde{s}_{T'}^i, \tilde{a}_{T'}^i)$ , s.t.  $\tilde{s}_t^i \sim p(\cdot | \tilde{s}_{t-1}^i, \tilde{a}_{t-1}^i)$ ,  $\tilde{a}_t^i \sim \pi^\theta(\cdot | \tilde{s}_t^i)$

    Set  $\hat{Q}(s_T^i, a_T^i) := \sum_{t'=0}^{T'} \gamma^{\frac{t'}{2}} R(\tilde{s}_{t'}^i, \tilde{a}_{t'}^i)$ .

**end**

Set  $\widehat{\nabla} J^K(\theta) = \frac{1}{K} \sum_{i=1}^K \hat{Q}(s_T^i, a_T^i) \nabla \log(\pi^\theta(a_T^i | s_T^i))$ .

---

- 864           • We assume that the rewards are bounded in  $[0, R^*]$ .
- 865           • The softmax parametrization is differentiable with respect to  $\theta$ , and  $\nabla \log(\pi^\theta(a|s))$  exists.
- 866           Moreover, by Lemma 3.4 we have that the gradient of  $\log(\pi^\theta(a|s))$  is Lipschitz and that
- 867            $\|\nabla \log(\pi^\theta(a|s))\|_2 \leq \sqrt{|\mathcal{A}|}$ .

868 **Lemma E.1.** *The estimator  $\widehat{\nabla} J^K(\theta)$  from algorithm 3 is an unbiased estimator of  $\nabla J(\theta)$ . Moreover,*

869 *there exists  $C > 0$  such that*

$$\mathbb{E}[\|\widehat{\nabla} J^K(\theta) - \nabla J(\theta)\|_2^2] \leq \frac{C}{K}.$$

870 *Proof.* By (Zhang et al., 2020, Theorem 4.3) we have that for  $\theta \in \Theta$  deterministic

$$\mathbb{E}[\widehat{\nabla} J^1(\theta)] = \nabla J(\theta)$$

871 and

$$\|\nabla J(\theta)\|_2 \leq \frac{R^* B_\Theta}{(1 - \gamma)^2}, \quad \|\widehat{\nabla} J^1(\theta)\|_2 \leq \frac{R^* B_\Theta}{(1 - \gamma)(1 - \gamma^{\frac{1}{2}})} \text{ a.s.,}$$

872 where  $B_\Theta$  such that  $\|\log(\pi^\theta(a|s))\|_2 \leq B_\Theta$ . From the proof of Lemma 3.4 we have that  $B_\Theta = \sqrt{|\mathcal{A}|}$ .

873 We deduce from Algorithm 3, that

$$E[\widehat{\nabla} J^K(\theta)] = \frac{1}{K} \sum_{i=1}^K \mathbb{E}[\widehat{\nabla} J^1(\theta)] = \nabla J(\theta).$$

874 For the variance we have

$$\begin{aligned} \mathbb{E}[\|\widehat{\nabla} J^K(\theta) - \nabla J(\theta)\|_2^2] &\leq \frac{1}{K} \mathbb{E}[\|\widehat{\nabla} J^1(\theta) - \nabla J(\theta)\|_2^2] \\ &\leq \frac{1}{K} \left( \mathbb{E}[\|\widehat{\nabla} J^1(\theta)\|_2^2] + 2\mathbb{E}[\|\widehat{\nabla} J^1(\theta)\|_2] \|\nabla J(\theta)\|_2 + \|\nabla J(\theta)\|_2^2 \right) \\ &\leq \frac{1}{K} \left( \frac{(R^*)^2 |\mathcal{A}|}{(1 - \gamma)^2 (1 - \gamma^{\frac{1}{2}})^2} + 2 \frac{R^* \sqrt{|\mathcal{A}|}}{(1 - \gamma)(1 - \gamma^{\frac{1}{2}})} \frac{R^* \sqrt{|\mathcal{A}|}}{(1 - \gamma)^2} + \frac{(R^*)^2 |\mathcal{A}|}{(1 - \gamma)^4} \right) \\ &= \frac{(R^*)^2 |\mathcal{A}|}{K} \left( \frac{1}{(1 - \gamma)^2 (1 - \gamma^{\frac{1}{2}})^2} + \frac{2}{(1 - \gamma)^3 (1 - \gamma^{\frac{1}{2}})} + \frac{1}{(1 - \gamma)^4} \right). \end{aligned}$$

875 Define  $C = (R^*)^2 |\mathcal{A}| \left( \frac{1}{(1 - \gamma)^2 (1 - \gamma^{\frac{1}{2}})^2} + \frac{2}{(1 - \gamma)^3 (1 - \gamma^{\frac{1}{2}})} + \frac{1}{(1 - \gamma)^4} \right)$  proves the claim.  $\square$

876 Using this estimator we can formulate the REINFORCE algorithm as presented in Williams (1992)

877 in Algorithm 4.

---

**Algorithm 4:** REINFORCE for discounted MDPs

---

**Result:** Approximate policy  $\hat{\pi}^* \approx \pi^*$ Initialize  $\theta_0 \in \mathbb{R}^{|\mathcal{S}||\mathcal{A}|}$ Choose step size  $\eta$ , number of training steps  $N$  and batch size  $K$ **for**  $n = 0, \dots, N - 1$  **do**    Sample  $\widehat{\nabla} J^K(\theta_n)$  as in Algorithm 3    Set  $\theta_{n+1} = \theta_n + \eta \widehat{\nabla} J^K(\theta_n)$ **end**Set  $\hat{\pi} = \pi^{\theta_N}$ .

---

**Lemma E.2.**

$$\left\| \frac{\partial V^\pi(\mu)}{\partial \theta} \right\|_2 \geq \left\| \frac{d_\mu^{\pi^*}}{\mu} \right\|_\infty^{-1} \min_{s \in \mathcal{S}} \frac{\pi^\theta(a^*(s)|s)}{1-\gamma} (V^*(\mu) - V^{\pi^\theta}(\mu)).$$

878 *Proof.* We rewrite the norm of the gradient as follows

$$\begin{aligned} \left\| \frac{\partial V^\pi(\mu)}{\partial \theta} \right\|_2 &= \left\| \sum_{s \in \mathcal{S}} \mu(s) \frac{\partial V^\pi(s)}{\partial \theta} \right\|_2 \\ &= \left( \sum_{s' \in \mathcal{S}} \sum_{a' \in \mathcal{A}} \left( \sum_{s \in \mathcal{S}} \mu(s) \frac{\partial V^\pi(s)}{\partial \theta(s', a')} \right)^2 \right)^{\frac{1}{2}} \\ &= \left( \sum_{a' \in \mathcal{A}} \left( \sum_{s \in \mathcal{S}} \mu(s) \frac{\partial V^\pi(s)}{\partial \theta(s, a')} \right)^2 \right)^{\frac{1}{2}} \end{aligned}$$

879 Note that we can interchange the derivative and the sum without further arguments because the state  
880 space  $\mathcal{S}$  is assumed to be finite. We continue as in the proof of (Mei et al., 2020, Lemma 8),

$$\begin{aligned} \left\| \frac{\partial V^\pi(\mu)}{\partial \theta} \right\|_2 &\geq \left| \sum_{s \in \mathcal{S}} \mu(s) \frac{\partial V^\pi(s)}{\partial \theta(s, a^*(s))} \right| \\ &= \left| \frac{\partial V^\pi(\mu)}{\partial \theta(\cdot, a^*(\cdot))} \right| \\ &= \frac{1}{1-\gamma} \sum_{s \in \mathcal{S}} |d_\mu^{\pi^\theta}(s) \pi^\theta(a^*(s)|s) A^{\pi^\theta}(s, a^*(s))| \\ &= \frac{1}{1-\gamma} \sum_{s \in \mathcal{S}} d_\mu^{\pi^\theta}(s) \pi^\theta(a^*(s)|s) |A^{\pi^\theta}(s, a^*(s))| \\ &\geq \frac{1}{1-\gamma} \left\| \frac{d_\mu^{\pi^*}}{d_\mu^{\pi^\theta}} \right\|_\infty^{-1} \min_{s \in \mathcal{S}} \pi^\theta(a^*(s)|s) \sum_{s \in \mathcal{S}} d_\mu^{\pi^*}(s) A^{\pi^\theta}(s, a^*(s)) \\ &= \left\| \frac{d_\mu^{\pi^*}}{d_\mu^{\pi^\theta}} \right\|_\infty^{-1} \min_{s \in \mathcal{S}} \pi^\theta(a^*(s)|s) (V^*(\mu) - V^{\pi^\theta}(\mu)). \end{aligned}$$

881 Furthermore, we can bound the distribution mismatch coefficient uniformly for all  $\theta$ ,

$$d_\mu^{\pi^\theta}(s) \geq (1-\gamma)\mu(s),$$

882 by Mei et al. (2020, Thm. 4), such that  $\left\| \frac{d_\mu^{\pi^*}}{d_\mu^{\pi^\theta}} \right\|_\infty^{-1} \leq (1-\gamma)^{-1} \left\| \frac{d_\mu^{\pi^*}}{\mu} \right\|_\infty^{-1}$ .  $\square$ 883 Recall the definitions of  $(\theta_n)_{n \geq 0}$  and  $(\bar{\theta}_n)_{n \geq 0}$  from (11). We denote by  $\mathcal{F}_n$  the natural filtration of  
884 the process  $(\theta_n)_{n \geq 0}$ . With respect to this filtration we define the stopping time

$$\tau = \min\{n \geq 0 : \|\theta_n - \bar{\theta}_n\| \geq \frac{c}{4}\}, \quad (30)$$

885 where  $c = \min_{n \geq 0} \min_{s \in \mathcal{S}} \pi^{\bar{\theta}^n}(a^*(s)|s) > 0$  by (Mei et al., 2020, Lemma 9) and  $a^*(s)$  the optimal  
 886 action of the deterministic optimal policy  $\pi^*$ .

887 **Lemma E.3.** *It holds almost surely that  $\min_{0 \leq n \leq \tau} \min_{s \in \mathcal{S}} \pi^{\theta^n}(a^*(s)|s) \geq \frac{c}{2}$  is strictly positive.*

888 *Proof.* Due to the Lipschitz continuity of the softmax function the proof is line-by-line as in  
 889 Lemma C.4.  $\square$

890 **Lemma E.4.** *Suppose  $\mu(s) > 0$  for all  $s \in \mathcal{S}$ , batch size  $K_n \geq \frac{9(1-\gamma)^4 c^2 C}{2048N^{\frac{3}{2}}}(1 - \frac{1}{2\sqrt{N}}) \left\| \frac{d_{\mu}^{\pi^*}}{\mu} \right\|_{\infty}^{-2} n^2$   
 891 for some  $N \geq 1$  and the step size  $\eta = \frac{(1-\gamma)^3}{8\sqrt{N}}$ , then*

$$\mathbb{E}\left[(J^* - J(\theta_n))\mathbf{1}_{\{n \leq \tau\}}\right] \leq \frac{128\sqrt{N}}{3(1 - \frac{1}{2\sqrt{N}})(1 - \gamma)c^2 n} \left\| \frac{d_{\mu}^{\pi^*}}{\mu} \right\|_{\infty}^2.$$

892 *Proof.* We slightly modify the proof of Lemma 4.2 for finite-time MDPs. First, we deduce from the  
 893  $\beta$ -smoothness of  $J$ , with  $\beta = \frac{8}{(1-\gamma)^3}$  (Mei et al. (2020), Agarwal et al. (2021)) that

$$J(\theta_{n+1}) \geq J(\theta_n) + \left(\eta - \frac{\beta\eta^2}{2}\right) \|\nabla J(\theta_n)\|^2 + (\eta - \beta\eta^2) \langle \nabla J(\theta_n), \xi_n \rangle - \frac{\beta\eta^2}{2} \|\xi_n\|^2,$$

894 where  $\xi_n := \widehat{\nabla} J^K(\theta_n) - \nabla J(\theta_n)$ . Next we take the conditional expectation on  $\mathcal{F}_n$ . Then by  
 895 Lemma E.1 we obtain

$$\mathbb{E}\left[J(\theta_{n+1})|\mathcal{F}_n\right] \geq J(\theta_n) + \left(\eta - \frac{\beta\eta^2}{2}\right) \|\nabla J(\theta_n)\|^2 - \frac{\beta\eta^2 C}{2K_n}.$$

896 Subtracting this equation from  $J^*$  and taking the expectation under the event  $\{n+1 \leq \tau\}$  results in:

$$\begin{aligned} & \mathbb{E}\left[(J^* - J(\theta_{n+1}))\mathbf{1}_{\{n+1 \leq \tau\}}\right] \\ & \leq \mathbb{E}\left[(J^* - J(\theta_n))\mathbf{1}_{\{n \leq \tau\}}\right] - \left(\eta - \frac{\beta\eta^2}{2}\right) \mathbb{E}\left[\|\nabla J(\theta_n)\|^2 \mathbf{1}_{\{n \leq \tau\}}\right] + \frac{\beta\eta^2 C}{2K_n} \end{aligned}$$

897 With the PL-type inequality Lemma E.2 and  $\min_{0 \leq n \leq \tau} \min_{s \in \mathcal{S}} \pi^{\theta^n}(a^*(s)|s) \geq \frac{c}{2}$  by Lemma E.3  
 898 we have

$$\begin{aligned} & \mathbb{E}\left[(J^* - J(\theta_{n+1}))\mathbf{1}_{\{n+1 \leq \tau\}}\right] \\ & \leq \mathbb{E}\left[(J^* - J(\theta_n))\mathbf{1}_{\{n \leq \tau\}}\right] - \left(\eta - \frac{\beta\eta^2}{2}\right) \frac{c^2}{4(1-\gamma)^2} \left\| \frac{d_{\mu}^{\pi^*}}{\mu} \right\|_{\infty}^{-2} \mathbb{E}\left[(J^* - J(\theta_n))\mathbf{1}_{\{n \leq \tau\}}\right]^2 + \frac{\beta\eta^2 C}{2K_n}. \end{aligned}$$

899 For  $d_n := \mathbb{E}\left[(J^* - J(\theta_n))\mathbf{1}_{\{n \leq \tau\}}\right]$  we obtain the recursive inequality

$$d_{n+1} \leq d_n - \left(\eta - \frac{\beta\eta^2}{2}\right) \frac{c^2}{4(1-\gamma)^2} \left\| \frac{d_{\mu}^{\pi^*}}{\mu} \right\|_{\infty}^{-2} d_n^2 + \frac{\beta\eta^2 C}{2K_n}.$$

900 We define  $w := \left(\eta - \frac{\beta\eta^2}{2}\right) \frac{c^2}{4(1-\gamma)^2} \left\| \frac{d_{\mu}^{\pi^*}}{\mu} \right\|_{\infty}^{-2}$  and  $B = \frac{\beta\eta^2 C}{2K_n} > 0$  such that

$$d_{n+1} \leq d_n(1 - wd_n) + \frac{B}{K_n}.$$

901 Note that  $w > 0$  by the assumption  $\mu(s) > 0$  for all  $s \in \mathcal{S}$ . Then by our choice of  $K_n$  and  $\eta$  it holds  
 902 that

$$\begin{aligned} K_n & \geq \frac{9(1-\gamma)^4 c^2 C}{2048N^{\frac{3}{2}}}(1 - \frac{1}{2\sqrt{N}}) \left\| \frac{d_{\mu}^{\pi^*}}{\mu} \right\|_{\infty}^{-2} n^2 \\ & = \frac{9c^2 C}{32(1-\gamma)^2 \beta^2 N^{\frac{3}{2}}}(1 - \frac{1}{2\sqrt{N}}) \left\| \frac{d_{\mu}^{\pi^*}}{\mu} \right\|_{\infty}^{-2} n^2 = \frac{9}{4} w B n^2. \end{aligned}$$

903 Furthermore, we have

$$\frac{4}{3w} = \frac{16\sqrt{N}\beta(1-\gamma)^2}{3(1-\frac{1}{2\sqrt{N}})c^2} \left\| \frac{d_\mu^{\pi^*}}{\mu} \right\|_\infty^2.$$

904 We obtain for  $\beta = \frac{8}{(1-\gamma)^3}$  that

$$d_1 \leq \frac{1}{(1-\gamma)} \leq \beta(1-\gamma)^2 \leq \frac{4}{3w} \leq \frac{4}{3w \cdot 1},$$

905 because  $c \leq 1$ ,  $\left\| \frac{d_\mu^{\pi^*}}{\mu} \right\|_\infty^2 \geq 1$  and  $\frac{1}{\sqrt{N}}(1 - \frac{1}{2\sqrt{N}}) < 1$  for all  $N \geq 1$ .

906 Suppose the induction assumption  $d_n \leq \frac{4}{3wn}$  holds true. The induction conclusion follows exactly as  
907 in the proof of Lemma 4.2: First, recall the recursive inequality

$$d_{n+1} \leq d_n - wd_n^2 + \frac{B}{K_n}.$$

908 The function  $f(x) = x - wx^2$  is monotonically increasing in  $[0, \frac{1}{2w}]$ , and by induction assumption  
909  $d_n \leq \frac{1}{4wn} \leq \frac{1}{2w}$ . Thus,

$$\begin{aligned} d_{n+1} &\leq d_n - wd_n^2 + \frac{B}{K_n} \\ &\leq \frac{4}{3wn} - \frac{16}{9wn^2} + \frac{B}{K_n} \\ &\leq \frac{4}{3wn} - \frac{16}{9wn^2} + \frac{4B}{9wBn^2} \\ &= \frac{4}{3wn} - \frac{12}{9wn^2} \\ &= \frac{4}{3w} \left( \frac{1}{n} - \frac{1}{n^2} \right) \\ &\leq \frac{4}{3wn}, \end{aligned}$$

910 by the choice of  $K_n \geq \frac{9}{4}wBn^2$ . We deduce the claim

$$d_n \leq \frac{4}{3wn} = \frac{16\sqrt{N}\beta(1-\gamma)^2}{3(1-\frac{1}{2\sqrt{N}})c^2n} \left\| \frac{d_\mu^{\pi^*}}{\mu} \right\|_\infty^2 = \frac{128\sqrt{N}}{3(1-\frac{1}{2\sqrt{N}})(1-\gamma)c^2n} \left\| \frac{d_\mu^{\pi^*}}{\mu} \right\|_\infty^2.$$

911 □

912 **Lemma E.5.** Suppose  $\mu(s) > 0$  for all  $s \in \mathcal{S}$ . For any  $N \geq 1$ , if  $\eta_h = \frac{(1-\gamma)^3}{\sqrt{N}8}$  and  $K \geq \frac{N^3C(1-\gamma)^6}{c^2\delta^2}$ ,  
913 then  $\mathbb{P}(\tau \leq N) \leq \delta$ .

914 *Proof.* The proof follows line by line from the proof of Lemma 4.3 for the finite-time MDP. □

915 **Theorem 6.1.** Let  $(\bar{\theta}_n)_{n \geq 0}$  and  $(\theta_n)_{n \geq 0}$  be the (stochastic) policy gradient updates from (11) for  
916 arbitrary initial  $\bar{\theta}_0 = \theta_0 \in \Theta$ . Suppose  $\mu(s) > 0$  for all  $s \in \mathcal{S}$  and choose for any  $\delta, \epsilon > 0$ ,

917 (i) the number of training steps  $N \geq \left( \frac{258}{3\epsilon\delta c^2(1-\gamma)^3} \right)^2$ ,

918 (ii) step size  $\eta = \frac{(1-\gamma)^3}{8\sqrt{N}}$

919 (iii) batch size  $K = \max \left\{ \frac{9(1-\gamma)^4 c^2 C}{2048} \left( \sqrt{N} - \frac{1}{2} \right) \left\| \frac{d_\mu^{\pi^*}}{\mu} \right\|_\infty^{-2}, \frac{4(1-\gamma)^6 N^3 C}{c^2 \delta^2} \right\}$ .

920 Then,  $\mathbb{P}((J^* - J(\theta_N)) \geq \epsilon) \leq \delta$ , where  $J^* = \sup_\theta J(\theta)$ .

921 *Proof.* We separate the probability using the stopping time  $\tau$  and obtain

$$\begin{aligned}
\mathbb{P}\left((J^* - J(\theta_N)) \geq \epsilon\right) &\leq \mathbb{P}\left(\{\tau \geq N\} \cap \{(J^* - J(\theta_N)) \geq \epsilon\}\right) \\
&\quad + \mathbb{P}\left(\{\tau \leq N\} \cap \{(J^* - J(\theta_N)) \geq \epsilon\}\right) \\
&\leq \frac{\mathbb{E}\left[(J^* - J(\theta_N))\mathbf{1}_{\{\tau \geq N\}}\right]}{\epsilon} + \mathbb{P}(\tau \leq N) \\
&\leq \frac{1}{\epsilon} \frac{128\sqrt{N}}{3(1-\gamma)\left(1 - \frac{1}{2\sqrt{N}}\right)c^2N} \left\| \frac{d_\mu^{\pi^*}}{\mu} \right\|_\infty^2 + \frac{\delta}{2} \\
&\leq \frac{\delta}{2} + \frac{\delta}{2} \\
&= \delta,
\end{aligned}$$

922 where the second inequality holds due to Lemma E.4 and Lemma E.5. The last inequality follows by  
923 our choice of  $N$ :

$$\frac{128}{3\epsilon(1-\gamma)\left(1 - \frac{1}{2\sqrt{N}}\right)c^2\sqrt{N}} \left\| \frac{d_\mu^{\pi^*}}{\mu} \right\|_\infty^2 \leq \frac{\delta}{2}$$

924 if and only if  $N \geq \left(\frac{256}{3\epsilon\delta c^2(1-\gamma)} \left\| \frac{d_\mu^{\pi^*}}{\mu} \right\|_\infty^2 + \frac{1}{2}\right)^2$ , which is satisfied if  $N \geq \left(\frac{258}{3\epsilon\delta c^2(1-\gamma)^3}\right)^2 \left\| \frac{d_\mu^{\pi^*}}{\mu} \right\|_\infty^4$ .

925 Note that we can use Lemma E.4 in the equation above with a constant batch size, because

$$\begin{aligned}
&\max \left\{ \frac{9(1-\gamma)^4 c^2 C}{2048N^{\frac{3}{2}}} \left(1 - \frac{1}{2\sqrt{N}}\right) \left\| \frac{d_\mu^{\pi^*}}{\mu} \right\|_\infty^{-2} n^2, \frac{(1-\gamma)^6 N^3 C}{c^2 \frac{\delta^2}{2}} \right\} \\
&\leq \max \left\{ \frac{9(1-\gamma)^4 c^2 C}{2048} \left(\sqrt{N} - \frac{1}{2}\right) \left\| \frac{d_\mu^{\pi^*}}{\mu} \right\|_\infty^{-2}, \frac{4(1-\gamma)^6 N^3 C}{c^2 \delta^2} \right\},
\end{aligned}$$

926 for all  $n \leq N$ . □
